# Supplementary material for: Epstein-Barr virus-associated primary nodal T/NK-cell lymphoma shows a distinct molecular signature and copy number changes
Source: PubMed Central journal article supplement — Haematologica. 2017 Nov 2;103(2):278–87. doi: 10.3324/haematol.2017.180430 (PMC5792272; doi:10.3324/haematol.2017.180430), 2018-02
Supplement: 2017.180430.NG_SUPPL.pdf [file 2017.180430.NG_SUPPL.pdf]

## Epstein-Barr virus-associated primary nodal T/NK-cell lymphoma shows a distinct molecular signature and copy number changes

Siok-Bian Ng,<sup>1,2,3\*</sup> Tae-Hoon Chung,<sup>3\*</sup> Seiichi Kato,<sup>4</sup> Shigeo Nakamura,<sup>4</sup> Emiko Takahashi,<sup>5</sup> Young-Hyeh Ko,<sup>6</sup> Joseph D. Khoury,<sup>7</sup> C. Cameron Yin,<sup>7</sup> Richie Soong,<sup>1,3</sup> Anand D. Jeyasekharan,<sup>3</sup> Michal Marek Hoppe,<sup>3</sup> Viknesvaran Selvarajan,<sup>1</sup> Soo-Yong Tan,<sup>1,2</sup> Soon-Thye Lim,<sup>8</sup> Choon-Kiat Ong,<sup>9</sup> Maarja-Liisa Nairismägi,<sup>9</sup> Priyanka Maheshwari,<sup>2</sup> Shoa-Nian Choo,<sup>1</sup> Shuangyi Fan,<sup>1</sup> Chi-Kuen Lee,<sup>1</sup> Shih-Sung Chuang<sup>10</sup> and Wee-Joo Chng<sup>3,11</sup>

<sup>1</sup>Department of Pathology, Yong Loo Lin School of Medicine, National University of Singapore; <sup>2</sup>Department of Pathology, National University Hospital, National University Health System, Singapore; <sup>3</sup>Cancer Science Institute of Singapore, National University of Singapore; <sup>4</sup>Department of Pathology and Laboratory Medicine, Nagoya University Hospital, Nagoya, Japan; <sup>5</sup>Department of Pathology, Aichi Medical University Hospital, Nagakute, Japan; <sup>6</sup>Department of Pathology, Samsung Medical Center, Sungkyunkwan University, Seoul, Korea; <sup>7</sup>Department of Hematopathology, The University of Texas MD Anderson Cancer Center, Houston, TX, USA; <sup>8</sup>Lymphoma Genomic Translational Research Laboratory, National Cancer Centre Singapore, Division of Medical Oncology, National Cancer Centre Singapore; <sup>9</sup>Lymphoma Genomic Translational Research Laboratory, Division of Medical Oncology, National Cancer Centre Singapore; <sup>10</sup>Department of Pathology, Chi-Mei Medical Center, Tainan, Taiwan and <sup>11</sup>Department of Haematology-Oncology, National University Cancer Institute of Singapore, National University Health System

\*S-BN and T-HC contributed equally to this work.

©2017 Ferrata Storti Foundation. This is an open-access paper. doi:10.3324/haematol.2017.180430

Received: September 9, 2017.

Accepted: October 27 2017.

Pre-published: November 2, 2017.

Correspondence: patnsb@nus.edu.sg or mdccwj@nus.edu.sg.

---

## Supplemental Methods

### Study group

The study group included 66 adult patients with no known immunodeficiency and diagnosed with EBV-positive T/NK-cell lymphoma (TNKL) involving extranodal and nodal sites between years 1992 to 2015. Some of the cases have been previously published.<sup>1-3</sup> All the cases were positive for cCD3, EBV-encoded small RNAs (EBER) in the majority of tumor cells (>50%), and at least one cytotoxic marker (TIA1 and/or granzyme B). The majority of these cases, including the nodal cases, would be classified as ENKTL based on the 2008 WHO lymphoma classification which recognizes that rare cases of ENKTL may present with nodal disease in the absence of extranodal involvement.<sup>4</sup> Systemic and cutaneous EBV-positive T/NK lymphoproliferative diseases occurring in children such as systemic EBV+ T-cell lymphoma, aggressive NK-cell leukemia, and chronic active EBV infection of T/NK type and hydroa vacciniforme-like lymphoproliferative disorder were excluded.

Clinical data including age, sex, ethnicity, site of disease presentation, nasal involvement, stage and overall survival were obtained (Table S1) and the cases were then categorized based on the following features: i) disease presentation (extranodal [EN-group] vs nodal [N-group]); ii) nasal involvement (absence vs presence); and iii) cell of origin (COO, T-cell vs NK-cell). T-cell lineage was assigned based on a) positive expression of TCRB and/or TCRG protein by immunohistochemistry (IHC) and/or b) detection of monoclonal TCRG rearrangement by PCR using the BIOMED2 protocol. NK-cell lineage was assigned based on the lack of TCRB and TCRG expression by IHC and germline TCRG by PCR.<sup>1,5,6</sup> (Figure S1) For cases that lacked clonality

testing and were negative for both TCRG and TCRB protein expression (denoted with [\*] in Table S1 and Figure 1A): i) T-cell lineage was assigned based on lack of CD56 expression and/or loss of TCR loci and ii) NK- lineage was assigned based on expression of CD56 and/or intact TCR loci. Cases lacking complete information or remained indeterminate in lineage were assigned as indeterminate (IND) (Figure S1).

### **Control tissues**

The normal B-cells, normal T-cells and normal NK-cells were isolated from peripheral blood. Benign lymph node tissues used for copy number analysis and GEP were benign or reactive FFPE lymph node tissues obtained from the archives of the department of pathology.

### **GEP**

GEP was performed using Affymetrix HuGene 1.0 ST arrays in this study. Total RNAs from NKTL FFPE tissues and FFPE normal tissue controls were extracted using RecoverAll Total Nucleic Acid Isolation (ThermoFisher Scientific Inc., USA) according to the manufacturer's instructions. All the sections were deparaffinized with Histo-Clear II (National Diagnostics, USA), subjected to proteinase K digestion, and extracted as per the manufacturer's protocol. The concentration and purity of the total RNA extracted were measured using the NanoDrop 2000 spectrophotometer (ThermoFisher Scientific Inc., USA). RNA quality was assessed with the Agilent 2100 Bioanalyzer (Agilent Technologies, USA) and the RNA 6000 LabChip kit (Agilent Technologies, USA). Amplification and labeling of RNA samples were performed using

the Ovation FFPE WTA System (NuGEN, USA). A total of 75 ng of input RNA was used to generate the amplified Ribo-SPIA product. Cleanup was performed with RNAClean magnetic beads (Agencourt Bioscience Corporation, USA) followed by Qiaquick PCR purification kit (Qiagen, Germany). Nanodrop 2000 spectrophotometer (ThermoFisher Scientific Inc., USA) was used to determine the amplified cDNA yield for the labeling and fragmentation steps. Amplified cDNA samples were fragmented and labeled using an Encore Biotine Module (NuGEN, USA). Hybridization cocktails were prepared according to NuGEN Encore Biotin Module user guide. Labeled products were hybridized onto Affymetrix Human Gene 1.0 ST arrays according to NuGEN specifications. Subsequently, the microarrays were washed and stained using user prepared wash and staining reagents. Scanning was performed on a GeneChip Scanner 3000.

### **GEP data processing and analysis**

Data analysis was performed using the R/Bioconductor system.<sup>7</sup> Considering the geographical and temporal complexity of sample collection and handling, GEP data were preprocessed with frozen robust multiarray analysis (FRMA) algorithm, an extension of renowned RMA algorithm that utilizes probe-specific effects and variances. Since the parameters are frozen using estimations from large publicly available microarray databases in fRMA, individualized chip processing and simple data addition extending the flexibility of data processing of Affymetrix microarrays.<sup>8,9</sup> Signal intensities for probesets were finally transformed to represent expression values for genes by averaging intensities larger than half of maximum one for probesets of specific genes.

Unsupervised hierarchical clustering was performed using the top 500 most variable genes selected by median absolute difference (MAD) of log<sub>2</sub>-transformed median-normalized expression values where each gene's expression values were normalized against its own overall median and log<sub>2</sub>-transformation was taken afterwards. This was to account for gene-by-gene difference in natural expression levels and to avoid undesirable impacts due to outliers. Euclidean distance was used as the distance metric between two expression vectors and average linkage was used to measure the distance between two clusters.

Differentially expressed genes (DEG) between clusters and N-group vs EN-group were identified by using the significance analysis of microarrays (SAM) algorithm<sup>10</sup> implemented in Bioconductor library 'siggenes'.<sup>11</sup> We chose genes with fold change  $\geq 1.5$  in either groups,  $p < 0.05$  and false discovery rate  $\leq 0.15$ . Gene Set Enrichment Analysis (GSEA) between N-group cases and normal lymph node control tissues was performed by using Broad Institute's java client program with MSigDB version 5.1.<sup>12</sup> based on  $p < 0.05$  and FDR  $< 0.2$ . We also performed GSEA analysis to investigate if there are signalling pathways which are significantly different between nodal group-T cell cases (N-T, n=16), extranodal group of T cell (EN-T, n=13) and extranodal group of NK cell origin (EN-NK, n=25) as follow: comparison (1): N-T vs EN-NK and comparison (2): N-T vs EN-T.

T-cell signature analysis was performed using genes CD27, CD3G, CD3D, ICOS, MAL, TCF7, PKIA<sup>13</sup> according to the procedure outlined in a previous publication.<sup>14</sup> In this case, log<sub>2</sub>-transformed median-normalized expression values of seven T-cell signature genes were simply added for each sample.

## **OncoScan® assay**

The OncoScan® FFPE assay (Affymetrix) was performed according to the manufacturer's instructions as previously published.<sup>15,16</sup> The recommended genomic DNA input amount of 79.2ng was used whenever possible. Briefly, the genomic DNA targets were annealed to molecular inversion probes (MIP) followed by gap-filling with dNTPs (ATs or GCs) to circularize the MIP probes. Non-circularized probes were removed by exonuclease I treatment. Circularized probes were then cleaved and released from the DNA targets, and inverted to the correct orientation for first round of PCR amplification before assessing for successful amplification on 4% E-Gel® 48 (Invitrogen). Thereafter, 2uL of PCR product was used for second round of PCR amplification followed by restriction digestion with HaeIII. Complete digestion was confirmed on the 4% E-Gel® 48 before digested products were hybridized to the OncoScan® arrays for 16 to 18 hours at 49°C, 60 rpm. Finally, the arrays were washed and stained in GeneChip® Fluidics Station 450 prior to scanning using the GeneChip® 3000 7G scanner. The OncoScan® Console (v1.3) software was utilized to produce the QC metric and other analysis data.

## **CNA analysis**

Segmentation results from OncoScan® Console and the probe-by-probe signal intensities were used for further analysis. Five levels of CNA (-2, -1, 0, +1, +2) were assumed in this study. Each segment was assigned to one of the possible CNA levels using the following rule: -2 (copy number (CN)  $\leq 0.5$ ), -1 ( $0.5 < \text{CN} \leq 1.5$ ), 0 ( $1.5 < \text{CN} < 2.5$ ), +1 ( $2.5 \leq \text{CN} < 3.5$ ), +2 ( $3.5 \leq \text{CN}$ ).

To derive CNAs specific to N-group and EN-group, ie. CNAs that are exclusively enriched or depleted in any of the groups, we split genomic regions into

disjoint base segments (BSs) of respectively unique gain/loss profiles and performed Fisher's exact test between the groups and gain/loss profile of each BS (shown below). Since start and end positions actual CNA segments of different samples cannot be identical (part (a)), we marked the start positions of all CNA segments from all samples first and constructed BSs by delimiting genomes by those marked positions (part (b)). In this construction, since BSs were delimited by start positions of actual segments, no BS can cross the boundary of any two actual CNA segments and hence any actual CNA segment can be represented by one BS or multiple consecutive BSs. Finally, the copy number of each BS was assigned to the copy number of encompassing actual CNA segment (part (c)). When this was applied to all chromosomes, we produced the CNA matrix. Finally, the association between each BS CNA profile (row of CNA matrix) BSs with  $p \leq 0.05$  were retained for further examination.

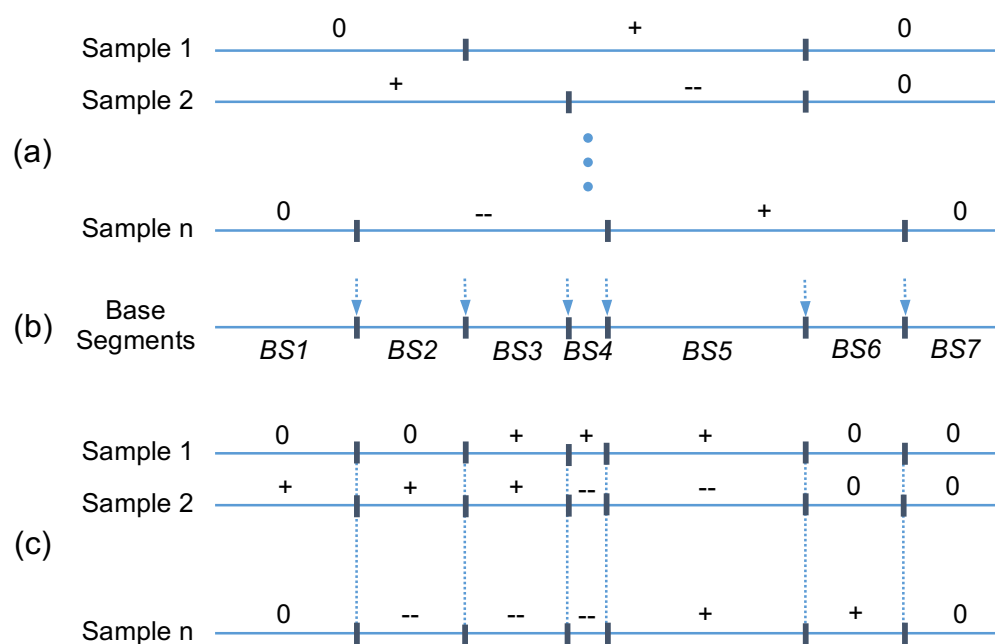

CNA of four TCR loci (TCRA, TCRB, TCRG, TCRD) were also examined using CNA levels of segments that harbored respective TCR locus. The following locations are used (hg19): TCRA: chr14: 22265459 – 23016719, TCRB: chr7: 142008780 –

142495186, TCRG: chr7: 38279181 – 38403119, TCRD: chr14: 22918107 – 22934912.

### **Multiplex immunofluorescence (MIF) and multispectral Imaging**

MIF for PD-L1/CD3 and CD2/CD3 was performed on 50 cases using 3 microns formalin fixed paraffin embedded (FFPE) sections using Opal™ 7-color Fluorophore TSA plus Fluorescence Kit (NEL797001KT, PerkinElmer, Inc.). Image acquisition and analysis were done with the Vectra 2 multispectral automated imaging system (PerkinElmer) and inForm 2.0 image analysis software. Nuance software (PerkinElmer) was employed to build the spectral libraries for the chromogens (Opal 570, Opal 690 and DAPI). These chromogen signature profiles were later used to spectrally unmix and quantitate CD3, CD2 and PD-L1 staining intensity, with appropriate regions for analysis chosen by 2 pathologists (NSB, PK).

For each case, 4 images containing at least 10000 cells were analyzed. The absolute optical density (OD) of each chromogen indicating the intensity of each antibody was obtained for every image was normalized against respective positive cutoff and the resulting median OD ratio was compared between N-group and EN-group. For PD-L1/CD3, slides were dewaxed and heat induced epitope retrieval (HIER) was performed at pH 9 for 20 min. This was followed by blocking of endogenous peroxidase activity and blocking with 10% albumin. Slides were subsequently incubated with PD-L1 (E1L3N, Cell Signalling 13684S, 1:100) for 60 min, incubated with Anti-Rabbit HRP labeled secondary antibody, and amplified with TSA plus Opal 570. HIER was performed again for 5 min followed by blocking with 10% albumin, incubation with CD3 (DAKO polyclonal, 1:100) for 30 min, incubation with



Anti-Rabbit HRP labeled secondary antibody, and amplification with TSA plus Opal 690. Slides were then counterstained with DAPI (FP1490). Appropriate controls were used.

For CD2/CD3; Slides were dewaxed and HIER was performed at pH 9 for 20 min. This was followed by blocking of endogenous peroxidase activity and blocking with 10% albumin. Slides were subsequently incubated with CD2 (EPR 6451, Abcam ab131276, 1:50) for 60 min, incubation with Anti-Rabbit HRP labeled secondary antibody, and amplification with TSA plus Opal 570. Slides were subjected to HIER for another 5 min, blocking with 10% albumin, incubation with CD3 (DAKO polyclonal, 1:100) for 30 min, incubation with Anti-Rabbit HRP labeled secondary antibody, and amplification with TSA plus Opal 690. Slides were then counterstained with DAPI (FP1490). Appropriate controls were also used.

### **FISH for TCRA**

All samples used were fixed in neutral buffered formalin and paraffin-embedded. 4- $\mu$ m sections were placed on electrostatically charged slides (Platinum Pro, Matsunami Glass Ind. Ltd, Japan). The sections were then subjected to direct FISH using the SureFISH 14q11.2 TCRAD probes (Agilent Technologies, TX, USA). The 468 kb probe specific for the 5' (centromeric) side spanning Human Chromosome 14:21645060-22113080 was labeled in P5 Green and the 305 kb probe specific for the 3' (telomeric) side spanning Human Chromosome 14:23031630-23336700 was labeled in Red. FISH was performed according to standard protocol as described previously.<sup>17</sup> A total of 100 non-overlapping nuclei were scored per case using

fluorescence microscopy. Cells that demonstrate a breakapart will have a distinct red signal distanced from a distinct green signal, indicating a translocation involving one TCRAD allele, in addition to one fused red/green (or yellow) signal of the normal chromosome 14 (signal pattern: 1R, 1G, 1Y). In the event of a biallelic translocation, no fused signals would be present, and two distinct red and two green signals would be seen (signal pattern: 2R, 2G). Cells that do not demonstrate a breakapart will have two fused signals (signal pattern: 2Y).

The interpretation of fused and breakapart signals was based on generally accepted guidelines used for all other commercially available break-apart FISH assays in clinical laboratories performing testing using this method. This approach requires the space between two signals to be greater than one signal diameter in order to be considered a split signal. The FISH images were obtained using an Olympus BX61 microscope and captured on the Applied Image Analysis System v.3.93 (Applied Imaging, Pittsburgh, PA)

## **References**

1. Kato S, Asano N, Miyata-Takata T, et al. T-cell receptor (TCR) phenotype of nodal Epstein-Barr virus (EBV)-positive cytotoxic T-cell lymphoma (CTL): a clinicopathologic study of 39 cases. *Am J Surg Pathol*. 2015;39(4):462-471.
2. Jeon YK, Kim JH, Sung JY, Han JH, Ko YH, Hematopathology Study Group of the Korean Society of P. Epstein-Barr virus-positive nodal T/NK-cell lymphoma: an analysis of 15 cases with distinct clinicopathological features. *Hum Pathol*. 2015;46(7):981-990.

3. Takahashi E, Asano N, Li C, et al. Nodal T/NK-cell lymphoma of nasal type: a clinicopathological study of six cases. *Histopathology*. 2008;52(5):585-596.
4. Chan JKC, Quintanilla-Martinez L, Ferry JA, Peh SC. Extranodal NK/T-cell lymphoma, nasal type. In: Swerdlow SH, Campo E, Harris NL, et al., eds. WHO classification of tumours of haematopoietic and lymphoid tissues. Lyon: IRAC Press; 2008:285-288.
5. Ko YH, Chan JKC, Quintanilla-Martinez L. Virally associated T-cell and NK-cell Neoplasms. In: Jaffe ES, Arber DA, Campo E, Harris NL, Quintanilla-Martinez L, eds. *Hematopathology*. Philadelphia: Elsevier; 2017:565-598.
6. Jhuang JY, Chang ST, Weng SF, et al. Extranodal natural killer/T-cell lymphoma, nasal type in Taiwan: a relatively higher frequency of T-cell lineage and poor survival for extranasal tumors. *Hum Pathol*. 2015;46(2):313-321.
7. Team RC. A language and environment for statistical computing. R Foundation for statistical computing, 2015; Vienna, Austria; 2016.
8. McCall MN, Bolstad BM, Irizarry RA. Frozen robust multiarray analysis (fRMA). *Biostatistics*. 2010;11(2):242-253.
9. McCall MN, Jaffee HA, Irizarry RA. fRMA ST: frozen robust multiarray analysis for Affymetrix Exon and Gene ST arrays. *Bioinformatics*. 2012;28(23):3153-3154.
10. Tusher VG, Tibshirani R, Chu G. Significance analysis of microarrays applied to the ionizing radiation response. *Proc Natl Acad Sci U S A*. 2001;98(9):5116-5121.
11. Schwender H. siggenes: Multiple testing using SAM and Efron's empirical Bayes approaches. R package version 1.46.0.; 2012.
12. Subramanian A, Tamayo P, Mootha VK, et al. Gene set enrichment analysis: a knowledge-based approach for interpreting genome-wide expression profiles. *Proc Natl Acad Sci U S A*. 2005;102(43):15545-15550.
13. Iqbal J, Weisenburger DD, Chowdhury A, et al. Natural killer cell lymphoma shares strikingly similar molecular features with a group of non-hepatosplenic gammadelta T-cell lymphoma and is highly sensitive to a novel aurora kinase A inhibitor in vitro. *Leukemia*. 2011;25(2):348-358.
14. Chng WJ, Chung TH, Kumar S, et al. Gene signature combinations improve prognostic stratification of multiple myeloma patients. *Leukemia*. 2016;30(5):1071-1078.

15. Lee CS, Bhaduri A, Mah A, et al. Recurrent point mutations in the kinetochore gene KNSTRN in cutaneous squamous cell carcinoma. *Nat Genet.* 2014;46(10):1060-1062.
16. Harms PW, Fullen DR, Patel RM, et al. Cutaneous basal cell carcinomas: evidence of clonality and recurrent chromosomal losses. *Hum Pathol.* 2015;46(5):690-697.
17. Ventura RA, Martin-Subero JI, Jones M, et al. FISH analysis for the detection of lymphoma-associated chromosomal abnormalities in routine paraffin-embedded tissue. *J Mol Diagn.* 2006;8(2):141-151.

**Supplemental Table 1. Clinicopathologic features of 66 cases of EBV-positive T/NK cell lymphoma.**

**Table 1A. Clinicopathologic features of Nodal-group**

| Sample ID | Age | Sex | Ethnicity  | DP | Stage | OS   | Status | Nasal | CD8 | CD56 | TCR Beta | TCR Gamma | PCR | TCR loss | COO |
|-----------|-----|-----|------------|----|-------|------|--------|-------|-----|------|----------|-----------|-----|----------|-----|
| NKTL50    | 35  | M   | Bangladesh | N  | 4     | 0.1  | 0      | No    | Neg | Neg  | Neg      | Neg       | na  | Yes      | T*  |
| NKTL59    | 85  | F   | Chinese    | N  | 3     | 1.3  | na     | na    | Neg | Neg  | Neg      | Neg       | na  | Yes      | T*  |
| TNK01     | 59  | M   | Japanese   | N  | 3     | 1.4  | 1      | No    | Neg | Neg  | Neg      | Neg       | na  | Yes      | T*  |
| NKTL69    | 81  | M   | Chinese    | N  | na    | 1    | 1      | na    | Pos | na   | Neg      | na        | R   |          | T   |
| A1        | 70  | M   | Japanese   | N  | 4     | 0.2  | 1      | No    | Pos | Neg  | Pos      | Neg       | R   | Yes      | T   |
| K1        | 55  | M   | Korean     | N  | 4     | 0.1  | 1      | No    | na  | Neg  | Pos      | na        | na  |          | T   |
| K2        | 89  | M   | Korean     | N  | 4     | 1.4  | 1      | No    | Pos | Neg  | Pos      | na        | na  |          | T   |
| NKTL40    | 58  | M   | Chinese    | N  | 4     | 3.5  | 1      | No    | Pos | Neg  | Pos      | na        | na  | Yes      | T   |
| T114      | 64  | M   | Japanese   | N  | 4     | 0.3  | 1      | No    | Pos | Neg  | Neg      | Neg       | R   | Yes      | T   |
| T242      | 68  | M   | Japanese   | N  | 4     | 1    | 1      | No    | Pos | Neg  | Neg      | Neg       | R   | Yes      | T   |
| T85       | 63  | M   | Japanese   | N  | 4     | 6    | 1      | No    | Pos | Neg  | Pos      | Neg       | na  |          | T   |
| TNK03     | 59  | F   | Japanese   | N  | 1     | 39.8 | 0      | No    | Pos | Neg  | Pos      | Neg       | na  | Yes      | T   |
| TNK09     | 59  | F   | Japanese   | N  | 1     | 23.8 | 0      | No    | Pos | Neg  | Pos      | Neg       | na  | Yes      | T   |
| TNK10     | 79  | F   | Japanese   | N  | 3     | 12.3 | 0      | No    | Pos | Neg  | Pos      | Neg       | na  | Yes      | T   |
| TNK04     | 55  | M   | Japanese   | N  | 4     | 9.5  | 1      | No    | Pos | Pos  | Pos      | na        | R   | Yes      | T   |
| TNK06     | 32  | M   | Japanese   | N  | 3     | 3.8  | 1      | No    | Pos | Pos  | Neg      | na        | R   | Yes      | T   |
| TNK05     | 49  | M   | Japanese   | N  | 4     | 1.3  | 1      | No    | Neg | Pos  | Neg      | na        | NR  |          | NK  |
| TW23      | 52  | M   | Chinese    | N  | 4     | 5.2  | 1      | No    | Neg | Pos  | Neg      | na        | NR  |          | NK  |
| NKTL65    | 46  | M   | Chinese    | N  | na    | na   | na     | No    | Neg | Neg  | Neg      | Neg       | na  |          | IND |

**Table 1B. Clinicopathologic features of Extranodal-group**

| Sample ID | Age | Sex | Ethnicity | DP | Stage | OS    | Status | Nasal | CD8 | CD56 | TCR Beta | TCR Gamma | PCR | TCR loss | COO |
|-----------|-----|-----|-----------|----|-------|-------|--------|-------|-----|------|----------|-----------|-----|----------|-----|
| MD05      | 64  | F   | Caucasian | EN | 4     | 4.8   | 1      | Yes   | Neg | Neg  | Neg      | Neg       | na  | Yes      | T*  |
| NKTL43    | 58  | F   | Chinese   | EN | 4     | 25.7  | 1      | No    | Neg | Pos  | Neg      | Neg       | na  | Yes      | T*  |
| MD15      | 72  | M   | Caucasian | EN | 1     | 27.8  | 1      | Yes   | Pos | Pos  | Neg      | Neg       | na  | Yes      | T*  |
| MD10      | 26  | F   | Hispanic  | EN | 2     | 147.5 | 0      | Yes   | na  | Neg  | Pos      | na        | na  | Yes      | T   |
| NKTL23A   | 51  | M   | Chinese   | EN | na    | 6.9   | 1      | No    | Neg | Neg  | Pos      | Neg       | R   | Yes      | T   |
| NKTL60    | 54  | M   | Chinese   | EN | 4     | 80.1  | 0      | No    | Neg | Neg  | Neg      | na        | R   | Yes      | T   |
| T202      | 63  | F   | Japanese  | EN | 4     | 1.5   | 1      | No    | Pos | Neg  | Neg      | Neg       | R   | Yes      | T   |
| T25       | 44  | M   | Japanese  | EN | 4     | 15    | 0      | No    | Neg | Neg  | Neg      | Pos       | NR  | No       | T   |
| TW40      | 43  | M   | Chinese   | EN | 1     | 14.7  | 0      | Yes   | na  | Neg  | Neg      | Neg       | R   |          | T   |
| MD02      | 47  | F   | Hispanic  | EN | 4     | 12.1  | 1      | Yes   | Neg | Pos  | Neg      | Neg       | R   |          | T   |
| TW08      | 32  | M   | Thai      | EN | 1     | 7     | 0      | na    | Neg | Pos  | Pos      | neg       | R   |          | T   |
| TW22      | 63  | M   | Chinese   | EN | 4     | 4.5   | 1      | No    | Neg | Pos  | neg      | pos       | na  | No       | T   |
| TW39      | 40  | F   | Chinese   | EN | 1     | 15    | 0      | Yes   | Neg | Pos  | Neg      | Neg       | R   | No       | T   |
| MD11      | 33  | M   | Hispanic  | EN | na    | 0.4   | 1      | No    | na  | Pos  | Neg      | Neg       | na  | No       | NK* |
| NKTL17    | 69  | M   | Chinese   | EN | na    | na    | na     | Yes   | Neg | Pos  | Neg      | Neg       | na  |          | NK* |
| NKTL36    | 56  | M   | Chinese   | EN | na    | na    | na     | na    | Neg | Pos  | Neg      | Neg       | na  | No       | NK* |
| NKTL41    | 37  | M   | Chinese   | EN | na    | na    | na     | Yes   | Neg | Pos  | Neg      | Neg       | na  | No       | NK* |
| NKTL52    | 65  | M   | Malay     | EN | 1     | 0.4   | na     | Yes   | Neg | Pos  | Neg      | Neg       | na  | No       | NK* |
| TW13      | 25  | M   | Chinese   | EN | na    | 0.3   | 1      | na    | Neg | Pos  | Neg      | Neg       | na  | No       | NK* |
| TW19      | 32  | F   | Chinese   | EN | na    | 8     | 0      | na    | Neg | Pos  | Neg      | Neg       | na  |          | NK* |
| TW26      | 41  | M   | Chinese   | EN | 1     | 157   | 0      | Yes   | Pos | Pos  | Neg      | Neg       | na  | No       | NK* |
| TW27      | 73  | M   | Chinese   | EN | 1     | 25    | 1      | Yes   | Neg | Pos  | Neg      | Neg       | na  | No       | NK* |
| TW29      | 34  | M   | Chinese   | EN | 1     | 138.8 | 0      | Yes   | Neg | Pos  | Neg      | Neg       | na  | No       | NK* |

|         |    |   |           |    |    |       |    |     |     |     |     |     |    |    |     |
|---------|----|---|-----------|----|----|-------|----|-----|-----|-----|-----|-----|----|----|-----|
| TW34    | 77 | M | Chinese   | EN | 1  | 7.3   | 1  | Yes | Neg | Pos | Neg | Neg | na | No | NK* |
| T241    | 74 | M | Japanese  | EN | 4  | 3.6   | 0  | No  | Neg | Neg | Neg | Neg | NR | No | NK  |
| TW10    | 33 | F | Chinese   | EN | 1  | 8     | 1  | na  | Neg | Neg | Neg | neg | NR |    | NK  |
| MD09    | 38 | F | Hispanic  | EN | 1  | 87.3  | 0  | No  | Neg | Pos | na  | na  | NR |    | NK  |
| MD13    | 35 | F | Asian     | EN | 1  | 20.2  | 1  | No  | na  | Pos | Neg | Neg | NR |    | NK  |
| T35     | 34 | F | Japanese  | EN | 4  | 0.9   | 1  | No  | Neg | Pos | Neg | Neg | NR |    | NK  |
| T72     | 21 | M | Japanese  | EN | 1  | 29.1  | 1  | No  | Neg | Pos | Neg | Neg | NR |    | NK  |
| TW07    | 57 | F | Taiwanese | EN | na | na    | na | na  | Neg | Pos | Neg | Neg | NR | No | NK  |
| TW09    | 37 | M | Chinese   | EN | na | 2     | 1  | na  | Pos | Pos | Neg | Neg | NR |    | NK  |
| TW11    | 78 | M | Chinese   | EN | 1  | 24    | 1  | na  | Neg | Pos | Neg | Neg | NR |    | NK  |
| TW24    | 49 | M | Chinese   | EN | 2  | 33    | 0  | Yes | Neg | Pos | Neg | Neg | NR |    | NK  |
| TW33    | 54 | F | Chinese   | EN | 1  | 107   | 0  | Yes | Neg | Pos | Neg | Neg | NR | No | NK  |
| TW35    | 53 | M | Chinese   | EN | 1  | 80.7  | 0  | Yes | Neg | Pos | Neg | Neg | NR |    | NK  |
| TW37    | 71 | F | Chinese   | EN | 4  | 12    | 1  | Yes | Pos | Pos | Neg | Neg | NR | No | NK  |
| TW38    | 57 | M | Chinese   | EN | 4  | 40.5  | 0  | No  | Neg | Pos | Neg | Neg | NR | No | NK  |
| MD04    | 36 | M | Asian     | EN | 1  | 132.4 | 1  | Yes | na  | na  | Neg | Neg | na | No | IND |
| NKTL22  | 46 | M | Chinese   | EN | na | na    | na | na  | Neg | Neg | Neg | Neg | na | No | IND |
| NKTL24  | 88 | M | Chinese   | EN | na | na    | na | na  | Neg | Neg | Neg | Neg | na | No | IND |
| NKTL27B | 32 | M | Malay     | EN | na | na    | na | na  | Neg | Neg | Neg | Neg | na | No | IND |
| NKTL53  | 40 | M | Chinese   | EN | 1  | 0.4   | na | Yes | Neg | Neg | Neg | Neg | na | No | IND |
| MD01    | 39 | M | Hispanic  | EN | 1  | 141.1 | 0  | Yes | na  | Pos | Neg | Neg | na |    | IND |
| MD07    | 35 | M | Caucasian | EN | 4  | 3     | 1  | No  | na  | Pos | na  | na  | na |    | IND |
| SGH2010 | 24 | M | chinese   | EN | 2  | 0.2   | 0  | No  | na  | Pos | Neg | Neg | na |    | IND |
| TW14    | 58 | M | Chinese   | EN | na | 119   | 0  | na  | Pos | Pos | Neg | Neg | na |    | IND |

M;male, F;female, N;nodal, EN;extranodal, DP; disease presentation, Stage; disease stage, OS; overall survival (months), Status; Dead=1 or Alive=0,Nasal; nasal involvement, na; not available, Pos; positive, Neg;negative, R; rearranged, NR; not rearranged, IND; indeterminate, PCR; TCRG clonality, COO: cell of origin, CNA; copy number analysis,

\* denotes cases with absence of TCRG/TCRB expressionand lacking TCR clonality data and. COO assigned based on combination of CD56 expression and/or TCR loci information

**Table S2 List of 500 top variable genes used to perform unsupervised clustering of 66 cases**

| No. | GENE        | No. | GENE     |
|-----|-------------|-----|----------|
| 1   | JCHAIN      | 251 | RAD50    |
| 2   | CCDC144B    | 252 | EIF3M    |
| 3   | KLRC4       | 253 | TMBIM1   |
| 4   | NOTCH2NL    | 254 | TMEM126B |
| 5   | HLA-DRB4    | 255 | YWHAB    |
| 6   | CENPS       | 256 | RABEP1   |
| 7   | CDR1        | 257 | SNRBP2   |
| 8   | BMS1P5      | 258 | GZMK     |
| 9   | RNU5B-1     | 259 | H3F3A    |
| 10  | VTRNA1-1    | 260 | AOAH     |
| 11  | CD2         | 261 | TIMM17A  |
| 12  | RPS4Y1      | 262 | KRT6C    |
| 13  | GPR89B      | 263 | EIF3A    |
| 14  | S100A8      | 264 | ZNF638   |
| 15  | IGLV@       | 265 | EOMES    |
| 16  | KLRC4-KLRK1 | 266 | ZNF700   |
| 17  | HIST1H2BI   | 267 | SLAMF6   |
| 18  | LOC440434   | 268 | PRH1     |
| 19  | PMS2P4      | 269 | LDHB     |



|    |              |     |           |
|----|--------------|-----|-----------|
| 20 | TCEAL6       | 270 | HSP90AB1  |
| 21 | LOC105375030 | 271 | PAIP2     |
| 22 | DHR SX       | 272 | HIST1H2BM |
| 23 | MIR21        | 273 | HADHA     |
| 24 | COX7B        | 274 | FMC1      |
| 25 | TRAPPC2B     | 275 | P2RY10    |
| 26 | GPR174       | 276 | ENY2      |
| 27 | LRRC37A      | 277 | SEC61G    |
| 28 | ULBP2        | 278 | IGHG4     |
| 29 | SELENOP      | 279 | HDGFRP3   |
| 30 | FCER1G       | 280 | IGKV3D-15 |
| 31 | APOBEC3A     | 281 | ANXA5     |
| 32 | FAM230B      | 282 | CTSB      |
| 33 | IGHA2        | 283 | USP7      |
| 34 | GOLGA8A      | 284 | TOMM5     |
| 35 | ANKRD20A3    | 285 | PTBP3     |
| 36 | GOLGA8B      | 286 | SMC3      |
| 37 | SPECC1L      | 287 | DNAJA2    |
| 38 | FAM95B1      | 288 | ARAP2     |
| 39 | STAG3L3      | 289 | EIF1AY    |
| 40 | SNORD75      | 290 | HIST1H2AE |
| 41 | LOC100233156 | 291 | CLEC2D    |
| 42 | NPIP5        | 292 | SNORD36B  |
| 43 | KLRC1        | 293 | PPP6C     |
| 44 | OR2W3        | 294 | TCEA1     |
| 45 | P2RX5        | 295 | GNAQ      |
| 46 | ARPC3        | 296 | ZNF474    |
| 47 | FAM24B       | 297 | U2AF1     |
| 48 | THRAP3       | 298 | NDUFB6    |
| 49 | RPSA         | 299 | DICER1    |

|    |              |     |          |
|----|--------------|-----|----------|
| 50 | LDHA         | 300 | SNORA33  |
| 51 | RNU5D-1      | 301 | SNORD12C |
| 52 | OVOS         | 302 | BCAP29   |
| 53 | OR10A2       | 303 | SLMAP    |
| 54 | SNORD116-14  | 304 | HMGB2    |
| 55 | TMEM189      | 305 | FRG2     |
| 56 | DDT          | 306 | SLC7A5P2 |
| 57 | LOC105371030 | 307 | TOP1     |
| 58 | HIST2H2AB    | 308 | ROCK1    |
| 59 | FAM21A       | 309 | OCR1     |
| 60 | LRRC37A4P    | 310 | PFDN4    |
| 61 | CXCL9        | 311 | ATP1B3   |
| 62 | PCDH11Y      | 312 | HIST1H3D |
| 63 | PMS2P5       | 313 | SNORA46  |
| 64 | IGKV2-24     | 314 | HIST1H4D |
| 65 | OR2T8        | 315 | RAB18    |
| 66 | MOP-1        | 316 | RARRES1  |
| 67 | AGAP6        | 317 | MIR9-1   |
| 68 | KLRC2        | 318 | DAD1     |
| 69 | USMG5        | 319 | GPR65    |
| 70 | THOC7        | 320 | SCIMP    |
| 71 | ANXA1        | 321 | POLR2K   |
| 72 | GYG1         | 322 | MSH5     |
| 73 | HSFY1        | 323 | MRPL35   |
| 74 | ABCC6        | 324 | RPL4     |
| 75 | SOD2         | 325 | HLA-DQA1 |
| 76 | NUCB2        | 326 | MMADHC   |
| 77 | ZNF737       | 327 | SNRPF    |
| 78 | SNORD44      | 328 | RAB21    |
| 79 | CD164        | 329 | GOLGA8F  |

|     |           |     |               |
|-----|-----------|-----|---------------|
| 80  | GCOM1     | 330 | CHKB          |
| 81  | CPT1B     | 331 | LSM12         |
| 82  | UBE2F     | 332 | SHFM1         |
| 83  | CLEC2B    | 333 | CFLAR         |
| 84  | MUC3A     | 334 | TRAV20        |
| 85  | NDUFA4    | 335 | RBBP8         |
| 86  | HSPA6     | 336 | CDK12         |
| 87  | GBP1      | 337 | HSPB11        |
| 88  | IFNG      | 338 | A2M           |
| 89  | RYBP      | 339 | PCM1          |
| 90  | PTPN22    | 340 | IGLV1-44      |
| 91  | ACAD11    | 341 | DTHD1         |
| 92  | CCL15     | 342 | PSMB4         |
| 93  | CD163     | 343 | GOLGA8K       |
| 94  | DPP4      | 344 | SNORD38B      |
| 95  | FCGR2A    | 345 | ENPP2         |
| 96  | PDE7A     | 346 | SLX1A-SULT1A3 |
| 97  | RRN3P1    | 347 | ARRDC3        |
| 98  | PWAR6     | 348 | RPF1          |
| 99  | LOC389765 | 349 | ZNF721        |
| 100 | SNORD78   | 350 | ELK2AP        |
| 101 | LGALS9C   | 351 | MGAT4A        |
| 102 | PILRB     | 352 | HNRNPK        |
| 103 | HIF1A     | 353 | TMX1          |
| 104 | GBP5      | 354 | SNORD28       |
| 105 | PLA2G7    | 355 | ZNF733P       |
| 106 | MT1H      | 356 | FAM27E2       |
| 107 | WARS      | 357 | PRPF4B        |
| 108 | KIR2DS4   | 358 | SH3GLB1       |
| 109 | EEF1E1    | 359 | SAA1          |

|     |          |     |             |
|-----|----------|-----|-------------|
| 110 | SERPINB1 | 360 | ACSL1       |
| 111 | CCL2     | 361 | ATP2A2      |
| 112 | IFNA17   | 362 | SNORD115-24 |
| 113 | NME1     | 363 | PSMA2       |
| 114 | KIAA0408 | 364 | AGTPBP1     |
| 115 | KLRC3    | 365 | CAP1        |
| 116 | CYTIP    | 366 | FN1         |
| 117 | ABCE1    | 367 | CCDC59      |
| 118 | SNORA20  | 368 | TCP1        |
| 119 | ABCB8    | 369 | GLRX        |
| 120 | PLEK     | 370 | UGP2        |
| 121 | NCKAP1L  | 371 | AIM2        |
| 122 | ELOVL5   | 372 | MAGEA3      |
| 123 | LYST     | 373 | SQRDL       |
| 124 | FGF7P6   | 374 | MLEC        |
| 125 | PSTPIP2  | 375 | PPP1R12A    |
| 126 | ANKRD22  | 376 | PUM2        |
| 127 | PFDN5    | 377 | LYZ         |
| 128 | ELL2     | 378 | HEXB        |
| 129 | FGF7P3   | 379 | ATP6V1C1    |
| 130 | HSP90B1  | 380 | TRMT13      |
| 131 | NUCKS1   | 381 | IQGAP1      |
| 132 | COMMD3   | 382 | SEPT7       |
| 133 | SNORA5A  | 383 | EFR3A       |
| 134 | SLC2A3   | 384 | RPS3        |
| 135 | LY75     | 385 | RBM12       |
| 136 | C4A      | 386 | PPA1        |
| 137 | ARHGAP15 | 387 | MAP4K4      |
| 138 | DDX12P   | 388 | KIR3DL1     |
| 139 | SYF2     | 389 | ADAM10      |

|     |            |     |         |
|-----|------------|-----|---------|
| 140 | LAMP2      | 390 | CMC4    |
| 141 | RAD21      | 391 | EIF3L   |
| 142 | IGLV3-25   | 392 | HSPA9   |
| 143 | CCNH       | 393 | SAT1    |
| 144 | DDX18      | 394 | CORO7   |
| 145 | FCGR2C     | 395 | CYBB    |
| 146 | INO80B     | 396 | GOLGA6C |
| 147 | SNORD4B    | 397 | PITPNB  |
| 148 | TMEM110    | 398 | NDUFC2  |
| 149 | SAMSN1     | 399 | UTS2    |
| 150 | HIST1H3G   | 400 | ASPM    |
| 151 | CKS2       | 401 | RPS17   |
| 152 | HSD17B7    | 402 | WTAP    |
| 153 | MIRLET7F1  | 403 | FAM133B |
| 154 | CCL18      | 404 | C1QA    |
| 155 | PSMA4      | 405 | EIF5B   |
| 156 | POTEE      | 406 | GNS     |
| 157 | TRAC       | 407 | TAX1BP1 |
| 158 | ATXN1      | 408 | CBWD2   |
| 159 | EVI2A      | 409 | IFIH1   |
| 160 | CSE1L      | 410 | TES     |
| 161 | LSM6       | 411 | MSL2    |
| 162 | CRYGD      | 412 | ATP5C1  |
| 163 | SNORD116-1 | 413 | CD3G    |
| 164 | EIF3E      | 414 | GAPDH   |
| 165 | TIMM23     | 415 | GBP4    |
| 166 | FAM49B     | 416 | PARP4   |
| 167 | PSMC2      | 417 | KTN1    |
| 168 | FGL2       | 418 | IGKC    |
| 169 | DDX60L     | 419 | MTHFD1  |

|     |              |     |           |
|-----|--------------|-----|-----------|
| 170 | RAB8B        | 420 | IQGAP2    |
| 171 | SF3B6        | 421 | IVNS1ABP  |
| 172 | UBE2L3       | 422 | ERAP2     |
| 173 | TMEM56       | 423 | CSDE1     |
| 174 | TNFSF13B     | 424 | CD3E      |
| 175 | RTEL1        | 425 | PSIP1     |
| 176 | SNORD61      | 426 | EXOC5     |
| 177 | SLAMF7       | 427 | ZNF587B   |
| 178 | CDC123       | 428 | CCL5      |
| 179 | PA2G4        | 429 | POM121C   |
| 180 | INPP4B       | 430 | SNX2      |
| 181 | RGS1         | 431 | SRI       |
| 182 | GZMA         | 432 | CCNI      |
| 183 | IDO1         | 433 | RBMY1A3P  |
| 184 | JPX          | 434 | BTBD1     |
| 185 | CASP4        | 435 | TPTE2P2   |
| 186 | LOC100130278 | 436 | ABI3BP    |
| 187 | HSPH1        | 437 | SMIM11A   |
| 188 | S100A10      | 438 | SNORD117  |
| 189 | PIP4K2A      | 439 | RAP1B     |
| 190 | KIF2A        | 440 | PIAS1     |
| 191 | GTF2H2       | 441 | EPRS      |
| 192 | SUPT16H      | 442 | RSL24D1   |
| 193 | KLRG1        | 443 | KRTAP10-9 |
| 194 | DDX1         | 444 | ATF2      |
| 195 | CALR         | 445 | CNOT1     |
| 196 | CSH1         | 446 | XRN1      |
| 197 | GALNT1       | 447 | COPB2     |
| 198 | GTF3A        | 448 | CENPW     |
| 199 | ERBIN        | 449 | CYB5B     |

|     |           |     |               |
|-----|-----------|-----|---------------|
| 200 | SNORD41   | 450 | FAM200B       |
| 201 | SNORD56B  | 451 | MCUR1         |
| 202 | SNORD13P1 | 452 | SNORA68       |
| 203 | PYHIN1    | 453 | DOCK10        |
| 204 | CLU       | 454 | ZC3H11A       |
| 205 | CXCL11    | 455 | ENTPD1        |
| 206 | SRP72     | 456 | MNDA          |
| 207 | SNORD60   | 457 | POLE4         |
| 208 | TNFSF10   | 458 | ZCRB1         |
| 209 | LSM3      | 459 | BHLHE40       |
| 210 | SATB1     | 460 | FCF1          |
| 211 | RSL1D1    | 461 | SH3KBP1       |
| 212 | POMP      | 462 | STON1-GTF2A1L |
| 213 | ITGA4     | 463 | NPAT          |
| 214 | C9orf78   | 464 | MBD2          |
| 215 | NUDT21    | 465 | ERO1A         |
| 216 | PAK2      | 466 | FAM156B       |
| 217 | DCUN1D1   | 467 | SCARNA4       |
| 218 | GTF2IRD2B | 468 | TRAM1         |
| 219 | EIF2A     | 469 | TLK1          |
| 220 | GK        | 470 | ME2           |
| 221 | RPS6KA3   | 471 | PRKACB        |
| 222 | CD24      | 472 | DENND4A       |
| 223 | MDM2      | 473 | PARP14        |
| 224 | OSBPL8    | 474 | CRYAB         |
| 225 | GDNF      | 475 | TMF1          |
| 226 | EEF2K     | 476 | RAB39B        |
| 227 | ELF1      | 477 | ATP5O         |
| 228 | ANKHD1    | 478 | HCRP1         |
| 229 | RPS12     | 479 | DNAJB11       |

|     |             |     |          |
|-----|-------------|-----|----------|
| 230 | SEPT5       | 480 | HCLS1    |
| 231 | SNORD116-24 | 481 | GUSBP3   |
| 232 | GNLY        | 482 | SERPINB9 |
| 233 | TYMS        | 483 | HELZ     |
| 234 | JAK1        | 484 | SH2D1A   |
| 235 | TSNAX       | 485 | STIP1    |
| 236 | CD274       | 486 | RRP15    |
| 237 | HBB         | 487 | KPNA2    |
| 238 | TIPRL       | 488 | RACK1    |
| 239 | CTSS        | 489 | C11orf58 |
| 240 | CD96        | 490 | FABP5    |
| 241 | ACTR3       | 491 | GOLGA6B  |
| 242 | KLRD1       | 492 | GTF2I    |
| 243 | HAUS6       | 493 | NT5C3A   |
| 244 | TXN         | 494 | TLR4     |
| 245 | CXCL10      | 495 | KCNA3    |
| 246 | NEDD8       | 496 | EIF2S1   |
| 247 | NAMPT       | 497 | WDR43    |
| 248 | H2AFZ       | 498 | PICALM   |
| 249 | SYNJ2BP     | 499 | SSB      |
| 250 | DMXL2       | 500 | ARID4B   |



**Table S3 Expression of CD8 and CD56 immunohistochemistry and cell of origin in the N-group and EN-group cases**

|                 |            |    | T-origin | NK-origin | Indeterminate origin | TOTAL |
|-----------------|------------|----|----------|-----------|----------------------|-------|
| EN-GROUP (n=39) | CD8-/CD56+ | 23 | 5        | 18        | 0                    | 23    |
|                 | CD8-/CD56- | 10 | 4        | 2         | 4                    | 10    |
|                 | CD8+/CD56+ | 5  | 1        | 3         | 1                    | 5     |
|                 | CD8+/CD56- | 1  | 1        | 0         | 0                    | 1     |
| N-GROUP (n=17)  | CD8-/CD56+ | 2  | 0        | 2         | 0                    | 2     |
|                 | CD8-/CD56- | 4  | 3        | 0         | 1                    | 4     |
|                 | CD8+/CD56+ | 2  | 2        | 0         | 0                    | 2     |
|                 | CD8+/CD56- | 9  | 9        | 0         | 0                    | 9     |
| <b>TOTAL</b>    |            |    | 25       | 25        | 6                    | 56    |

10 cases with incomplete CD8 and CD56 IHC data are not included in the table.

Cases with indeterminate origin are negative for both TCRB and TCRG IHC but lacks clonality data.

**Table S4. Multivariate survival analysis using clinicopathologic factors significantly different between N- and EN-groups.**

| <b>Covariate</b>                                   | <b>Hazard Ratio</b> | <b>95% Confidence Interval</b> | <b>P-value</b> |
|----------------------------------------------------|---------------------|--------------------------------|----------------|
| Age*                                               | 1.01                | 0.98-1.05                      | 0.54           |
| Stage: I (ref) vs II to IV                         | 2.06                | 1.32-3.22                      | 0.0015         |
| Disease Presentation:<br>Nodal vs extranodal (ref) | 4.04                | 1.3-12.51                      | 0.016          |
| Lineage:<br>NK vs indeterminate (ref)              | 0.45                | 0.08-2.6                       | 0.37           |
| Lineage:<br>T vs indeterminate (ref)               | 0.38                | 0.06-2.32                      | 0.3            |
| Nasal involvement :<br>Present vs Absent (ref)     | 1.3                 | 0.36-4.72                      | 0.69           |

Ref: reference, \*; age is assessed as a continuous variable

**Table S5 Differentially expressed genes (DEG) between the N-group and EN-group (p<0.05, False Discovery Rate (FDR) <0.15, and Fold Change of ≥1.5)**

**A) Genes downregulated in nodal compared to extranodal group cases**

| No. | Symbol      | Fold change | p-value     | FDR         |
|-----|-------------|-------------|-------------|-------------|
| 1   | SPAG11A     | 2.752022755 | 0.000536472 | 0.06046579  |
| 2   | POM121      | 2.73787768  | 0.006358416 | 0.108848315 |
| 3   | HSPA6       | 2.313897848 | 0.006791769 | 0.111021531 |
| 4   | KLRC1       | 2.236197649 | 0.00375309  | 0.092378803 |
| 5   | IGHA2       | 2.140101459 | 0.012337541 | 0.130880083 |
| 6   | TRIM49B     | 2.098392076 | 9.79E-05    | 0.049884668 |
| 7   | ZNF733P     | 2.073871991 | 0.006579211 | 0.110222882 |
| 8   | KLRC3       | 2.030809531 | 0.007921153 | 0.115341606 |
| 9   | POSTN       | 2.010623514 | 0.000168494 | 0.055643815 |
| 10  | SNORD113-3  | 2.00943472  | 3.41E-05    | 0.031600548 |
| 11  | HSPB2       | 1.991362451 | 0.000288137 | 0.055643815 |
| 12  | SNORD115-24 | 1.98406037  | 0.000518955 | 0.060340969 |
| 13  | OR2T8       | 1.983829361 | 0.013812237 | 0.134530201 |
| 14  | SERPINB3    | 1.980606516 | 0.000431284 | 0.058833612 |
| 15  | AQP7P1      | 1.93274229  | 0.003784002 | 0.092378803 |
| 16  | SH2D1B      | 1.931353467 | 0.000114292 | 0.050800369 |
| 17  | MYZAP       | 1.908823486 | 0.005534174 | 0.105346258 |
| 18  | SNORD113-4  | 1.904767316 | 0.000332296 | 0.055643815 |
| 19  | CRYAB       | 1.903300013 | 0.001202919 | 0.071703864 |
| 20  | FJX1        | 1.891186474 | 0.007706776 | 0.115239787 |
| 21  | KLRC2       | 1.864937208 | 0.004718793 | 0.099965614 |

|    |              |             |             |             |
|----|--------------|-------------|-------------|-------------|
| 22 | CD56 (NCAM1) | 1.863394822 | 0.002867916 | 0.088566319 |
| 23 | DEFB134      | 1.843630661 | 0.012251465 | 0.130700778 |
| 24 | TSPAN8       | 1.841603079 | 0.0003026   | 0.055643815 |
| 25 | RBMY1A3P     | 1.83560949  | 0.009987733 | 0.122826729 |
| 26 | PIGR         | 1.82425852  | 0.00039374  | 0.058808812 |
| 27 | MIR29A       | 1.801127343 | 0.000467875 | 0.059605989 |
| 28 | HIST1H2AI    | 1.77312148  | 0.000259841 | 0.055643815 |
| 29 | SNORD114-2   | 1.756407568 | 0.000617265 | 0.062455931 |
| 30 | REG3A        | 1.753043521 | 0.001077218 | 0.071677338 |
| 31 | ACOT1        | 1.742606035 | 0.000979269 | 0.071481072 |
| 32 | MMP1         | 1.735956559 | 0.000466171 | 0.059605989 |
| 33 | DEFB1        | 1.725891234 | 9.53E-05    | 0.049884668 |
| 34 | SEPT7P9      | 1.723790525 | 0.003514055 | 0.090650839 |
| 35 | AGR2         | 1.714314889 | 0.000208114 | 0.055643815 |
| 36 | STATH        | 1.71074161  | 0.009648338 | 0.121289854 |
| 37 | SAA2         | 1.694020058 | 0.002828698 | 0.088361283 |
| 38 | SLFN13       | 1.689739797 | 0.002414576 | 0.087075086 |
| 39 | CEACAM5      | 1.683523029 | 0.004456014 | 0.096959066 |
| 40 | SLC4A10      | 1.679229271 | 2.53E-06    | 0.009640218 |
| 41 | ZNF676       | 1.677101829 | 0.001491654 | 0.07497069  |
| 42 | PLA2G10      | 1.669811312 | 0.00365259  | 0.09233847  |
| 43 | SNORD114-3   | 1.661990354 | 0.008210489 | 0.115341606 |
| 44 | UGT2B17      | 1.660172117 | 0.000874754 | 0.068813834 |
| 45 | PLA2G2A      | 1.654146769 | 0.000183065 | 0.055643815 |
| 46 | MEDAG        | 1.653607195 | 8.29E-05    | 0.049884668 |
| 47 | S100A2       | 1.652834562 | 0.005484759 | 0.105309656 |
| 48 | SULF1        | 1.650235645 | 0.002920924 | 0.088718267 |
| 49 | TFPI2        | 1.640772478 | 5.04E-05    | 0.039175535 |
| 50 | OR13C2       | 1.637028059 | 0.000186553 | 0.055643815 |

|    |           |             |             |             |
|----|-----------|-------------|-------------|-------------|
| 51 | REG1A     | 1.632304812 | 0.003961696 | 0.092378803 |
| 52 | EPCAM     | 1.631282165 | 0.000482379 | 0.059605989 |
| 53 | SNORD1A   | 1.630094788 | 0.012897848 | 0.132733421 |
| 54 | SLPI      | 1.62981236  | 0.018464045 | 0.145714351 |
| 55 | DCN       | 1.623027824 | 0.010562448 | 0.124718574 |
| 56 | Sep-10    | 1.616908908 | 0.002643373 | 0.087727213 |
| 57 | SFRP2     | 1.616022404 | 0.005123126 | 0.101892325 |
| 58 | TOMM7     | 1.604805558 | 0.000795938 | 0.068813834 |
| 59 | SIGLEC17P | 1.600014861 | 0.002499392 | 0.087131118 |
| 60 | UGT2B28   | 1.597120494 | 0.001880577 | 0.081447106 |
| 61 | LRRC66    | 1.586513274 | 7.01E-05    | 0.048449737 |
| 62 | MSMB      | 1.585296096 | 0.002565499 | 0.087490105 |
| 63 | POTEC     | 1.581898268 | 0.017425886 | 0.142960638 |
| 64 | OR8H3     | 1.580503414 | 0.001249755 | 0.07234252  |
| 65 | RNASE4    | 1.57912689  | 0.006944688 | 0.111798456 |
| 66 | SLFN14    | 1.577384531 | 0.000540535 | 0.06046579  |
| 67 | UGT2B15   | 1.5650055   | 0.002251575 | 0.083646712 |
| 68 | MMP3      | 1.561452136 | 0.005917026 | 0.106984411 |
| 69 | SCHIP1    | 1.557227862 | 0.006829324 | 0.111021531 |
| 70 | SNORD7    | 1.556930649 | 0.00122542  | 0.071703864 |
| 71 | CFHR1     | 1.555752693 | 0.014789454 | 0.136854896 |
| 72 | EHF       | 1.5519857   | 0.000211363 | 0.055643815 |
| 73 | FBXW10    | 1.551239624 | 0.014221967 | 0.136127417 |
| 74 | KIR2DL4   | 1.54952909  | 0.017600046 | 0.143273554 |
| 75 | TVP23C    | 1.544886038 | 0.002474583 | 0.087075086 |
| 76 | TSPAN1    | 1.54330625  | 0.000130211 | 0.053344665 |
| 77 | POU5F1    | 1.537683878 | 0.007008485 | 0.111798456 |
| 78 | OR1J1     | 1.537674247 | 0.019559671 | 0.149353904 |
| 79 | PIP       | 1.535316381 | 0.00590071  | 0.106984411 |

|    |             |             |             |             |
|----|-------------|-------------|-------------|-------------|
| 80 | CFHR2       | 1.53522801  | 0.006676311 | 0.110486678 |
| 81 | TMEM244     | 1.533828554 | 0.001878106 | 0.081447106 |
| 82 | CDH17       | 1.532902578 | 0.000378365 | 0.058808812 |
| 83 | ITGA1       | 1.529751333 | 0.017750077 | 0.143631963 |
| 84 | MIR29B1     | 1.528479375 | 0.008538386 | 0.116711852 |
| 85 | KRTAP12-2   | 1.523274212 | 0.007933628 | 0.115341606 |
| 86 | FOXD2       | 1.519537047 | 0.00825884  | 0.115358214 |
| 87 | CAMK2N1     | 1.512897411 | 0.000504529 | 0.060340969 |
| 88 | PCAT4       | 1.512524772 | 0.005874164 | 0.106880173 |
| 89 | FOXP2       | 1.511109247 | 8.21E-06    | 0.018168003 |
| 90 | INHBA       | 1.509171843 | 0.00277549  | 0.088150892 |
| 91 | SNORD115-33 | 1.503910687 | 0.001406446 | 0.073122324 |
| 92 | GNGT1       | 1.503201013 | 0.003556865 | 0.091459582 |
| 93 | MUC13       | 1.501311972 | 0.001904414 | 0.081447106 |

**B) Genes upregulated in nodal compared to extranodal group cases**

| No. | Symbol    | Fold change | p-value     | FDR         |
|-----|-----------|-------------|-------------|-------------|
| 1   | MT1H      | 3.198607775 | 0.002746399 | 0.088150892 |
| 2   | HIST1H2BI | 3.191816504 | 0.000434917 | 0.058833612 |
| 3   | CD3G      | 3.160975967 | 3.66E-07    | 0.003197336 |
| 4   | GPR89B    | 3.133868248 | 0.012386039 | 0.131078757 |
| 5   | ADAMDEC1  | 2.963129885 | 0.000552696 | 0.06046579  |
| 6   | CD3D      | 2.920820951 | 0.00023652  | 0.055643815 |
| 7   | THEMIS    | 2.823981741 | 0.001133232 | 0.071677338 |

|    |           |             |             |             |
|----|-----------|-------------|-------------|-------------|
| 8  | PLA2G7    | 2.742710687 | 0.00088902  | 0.068813834 |
| 9  | GPR174    | 2.731299024 | 0.002463297 | 0.087075086 |
| 10 | ULBP2     | 2.710086742 | 0.011553016 | 0.128353156 |
| 11 | ENPP2     | 2.672445720 | 0.000193565 | 0.055643815 |
| 12 | CHI3L1    | 2.643527017 | 0.000885413 | 0.068813834 |
| 13 | CD2       | 2.638380463 | 0.00527322  | 0.103187237 |
| 14 | HIST1H4D  | 2.540562512 | 1.81E-05    | 0.028678054 |
| 15 | MSH5      | 2.455639029 | 0.010472634 | 0.12436604  |
| 16 | SNORA24   | 2.445075798 | 0.000912331 | 0.068813834 |
| 17 | CCL19     | 2.376857525 | 5.14E-07    | 0.003197336 |
| 18 | AGAP6     | 2.345487543 | 0.017243617 | 0.142791776 |
| 19 | IL18      | 2.325313260 | 0.001133931 | 0.071677338 |
| 20 | HIST1H2AE | 2.310887436 | 0.001245432 | 0.07234252  |
| 21 | CXCL9     | 2.283823709 | 0.008102457 | 0.115341606 |
| 22 | CLU       | 2.280100585 | 0.000584957 | 0.061694854 |
| 23 | GPR137B   | 2.278636641 | 0.000194517 | 0.055643815 |
| 24 | ABI3BP    | 2.237063204 | 0.000805914 | 0.068813834 |
| 25 | FCER1G    | 2.236071040 | 0.014606667 | 0.136497006 |
| 26 | TMEM110   | 2.193587388 | 0.00400883  | 0.092378803 |
| 27 | CTSB      | 2.158524499 | 0.002939469 | 0.088718267 |
| 28 | CYBB      | 2.150772589 | 0.001161682 | 0.071703864 |
| 29 | DENND2D   | 2.127225579 | 0.000236771 | 0.055643815 |
| 30 | LCP1      | 2.116200749 | 0.001939644 | 0.081659013 |
| 31 | CXCL10    | 2.094548400 | 0.017749398 | 0.143631963 |
| 32 | SDCBP     | 2.086453434 | 0.001055753 | 0.071645798 |
| 33 | GBP1      | 2.076209422 | 0.014792446 | 0.136854896 |
| 34 | LEF1      | 2.067098565 | 0.000215889 | 0.055643815 |
| 35 | VCAM1     | 2.053309359 | 0.002349951 | 0.086017532 |
| 36 | CCL18     | 2.044612734 | 0.003152218 | 0.089648643 |

|    |           |             |             |             |
|----|-----------|-------------|-------------|-------------|
| 37 | CD28      | 2.025651437 | 0.00051139  | 0.060340969 |
| 38 | CD3E      | 2.021862094 | 0.003905216 | 0.092378803 |
| 39 | SLMO2     | 2.002434787 | 0.002556688 | 0.087490105 |
| 40 | LYST      | 1.998430548 | 0.007369609 | 0.113934632 |
| 41 | HIST1H2BM | 1.997351957 | 0.000593032 | 0.061826677 |
| 42 | PSMB4     | 1.996276507 | 0.006034783 | 0.10760028  |
| 43 | CD53      | 1.995806736 | 0.000658216 | 0.065013691 |
| 44 | TXN       | 1.995647510 | 0.003091724 | 0.089648643 |
| 45 | CSF2RB    | 1.988439413 | 2.50E-05    | 0.031108092 |
| 46 | HLA-DQA1  | 1.977780757 | 0.005234716 | 0.103128054 |
| 47 | HIST1H4L  | 1.974418702 | 0.000909549 | 0.068813834 |
| 48 | CXCL11    | 1.974084710 | 0.01450475  | 0.136497006 |
| 49 | HSPA8     | 1.972279736 | 0.010738119 | 0.125365539 |
| 50 | GNS       | 1.970637759 | 0.003644996 | 0.09233847  |
| 51 | HIST1H4H  | 1.960255701 | 0.004717804 | 0.099965614 |
| 52 | CD8A      | 1.951339360 | 0.000344014 | 0.055643815 |
| 53 | CNN2      | 1.944967330 | 0.00129085  | 0.072826782 |
| 54 | STAT1     | 1.923116677 | 0.000897469 | 0.068813834 |
| 55 | HIST1H2BE | 1.922874216 | 6.03E-05    | 0.044142123 |
| 56 | WARS      | 1.919290883 | 0.013640619 | 0.134214201 |
| 57 | CHI3L2    | 1.916094763 | 0.001792608 | 0.080832023 |
| 58 | GM2A      | 1.901418699 | 0.015530036 | 0.138234205 |
| 59 | CTSL      | 1.885378385 | 0.012746824 | 0.132733421 |
| 60 | ZNF841    | 1.884396199 | 0.012845296 | 0.132733421 |
| 61 | COMMD3    | 1.883356505 | 0.002894073 | 0.088718267 |
| 62 | GBP4      | 1.876347798 | 0.012836374 | 0.132733421 |
| 63 | SMPDL3A   | 1.875800528 | 0.004115793 | 0.092559764 |
| 64 | SMAP2     | 1.875679352 | 0.002466571 | 0.087075086 |
| 65 | NPL       | 1.867044071 | 0.003452697 | 0.090463207 |



|    |             |             |             |             |
|----|-------------|-------------|-------------|-------------|
| 66 | IFNGR2      | 1.865641406 | 0.001495023 | 0.07497069  |
| 67 | CD274       | 1.862705629 | 0.017241287 | 0.142791776 |
| 68 | LINC00266-1 | 1.862099974 | 0.001741677 | 0.080825881 |
| 69 | BIRC3       | 1.862034259 | 0.001804578 | 0.081078026 |
| 70 | IFNAR1      | 1.861794512 | 0.002770118 | 0.088150892 |
| 71 | HSD11B1     | 1.860434535 | 0.000596142 | 0.061826677 |
| 72 | SLC7A5P1    | 1.858683589 | 0.01553885  | 0.138234205 |
| 73 | SGTB        | 1.857294604 | 0.000100207 | 0.049884668 |
| 74 | RNU4-2      | 1.856464829 | 0.003163311 | 0.089648643 |
| 75 | TUBB4A      | 1.855598707 | 0.00133959  | 0.073122324 |
| 76 | ADA         | 1.853605758 | 0.000876878 | 0.068813834 |
| 77 | STAMBPL1    | 1.852825183 | 0.004820047 | 0.099965614 |
| 78 | EOMES       | 1.850281173 | 0.017339689 | 0.142960638 |
| 79 | NCKAP1L     | 1.842757572 | 0.008512756 | 0.116550323 |
| 80 | GABARAP     | 1.840570920 | 0.002018906 | 0.081659013 |
| 81 | UCP2        | 1.839723538 | 0.000398618 | 0.058808812 |
| 82 | RPS24       | 1.836608343 | 0.010634256 | 0.124973614 |
| 83 | PSAP        | 1.830395907 | 0.001512022 | 0.07497069  |
| 84 | TMEM56      | 1.826694966 | 0.012169082 | 0.130315464 |
| 85 | PAG1        | 1.825983999 | 0.006615128 | 0.110486678 |
| 86 | SCARNA1     | 1.819402121 | 0.009385952 | 0.120536614 |
| 87 | SRP14       | 1.819104246 | 0.001928676 | 0.081659013 |
| 88 | MT1JP       | 1.819094552 | 0.015716824 | 0.138234205 |
| 89 | UBE2D1      | 1.814734350 | 0.012983511 | 0.132733421 |
| 90 | HLA-DQB1    | 1.814389365 | 0.00324609  | 0.089883967 |
| 91 | HIST1H3F    | 1.811179501 | 0.002670445 | 0.087922307 |
| 92 | GPR65       | 1.805810349 | 0.003109656 | 0.089648643 |
| 93 | ATP6AP1     | 1.802362609 | 0.002722146 | 0.088150892 |
| 94 | COTL1       | 1.801237268 | 0.001182873 | 0.071703864 |

|     |           |             |             |             |
|-----|-----------|-------------|-------------|-------------|
| 95  | ATM       | 1.801050838 | 0.013047426 | 0.132793468 |
| 96  | FYB       | 1.798388025 | 0.013694455 | 0.134214201 |
| 97  | HIST1H1D  | 1.797259387 | 0.000253045 | 0.055643815 |
| 98  | HIST1H2BN | 1.796704962 | 0.00561599  | 0.105654844 |
| 99  | HSP90AB1  | 1.794418654 | 0.014426536 | 0.136403828 |
| 100 | UHMK1     | 1.791259044 | 0.001365876 | 0.073122324 |
| 101 | CMKLR1    | 1.790705667 | 0.001028104 | 0.071481072 |
| 102 | SERPINB9  | 1.788035489 | 0.01164536  | 0.128598584 |
| 103 | DICER1    | 1.785080904 | 0.007893811 | 0.115341606 |
| 104 | ALAS1     | 1.782868716 | 0.003118178 | 0.089648643 |
| 105 | IL10      | 1.780708172 | 0.002109413 | 0.081659013 |
| 106 | RAC2      | 1.780369254 | 0.003020047 | 0.088963367 |
| 107 | ELOVL5    | 1.779852926 | 0.01395499  | 0.135366145 |
| 108 | CADM1     | 1.778077912 | 0.00189093  | 0.081447106 |
| 109 | TNFAIP2   | 1.773708042 | 0.000299313 | 0.055643815 |
| 110 | RNF213    | 1.772360823 | 0.005603431 | 0.105654844 |
| 111 | PPA1      | 1.771568552 | 0.008431626 | 0.115965844 |
| 112 | KIAA1551  | 1.766541408 | 0.016946177 | 0.142120942 |
| 113 | SLC39A8   | 1.762658580 | 0.008126535 | 0.115341606 |
| 114 | TMEM30A   | 1.761055690 | 0.002709129 | 0.088150892 |
| 115 | CREG1     | 1.760045813 | 0.005774237 | 0.106305333 |
| 116 | LGMN      | 1.752338788 | 0.004530044 | 0.097390266 |
| 117 | RGL1      | 1.751073557 | 0.003990206 | 0.092378803 |
| 118 | GRINA     | 1.750256888 | 0.00185867  | 0.081447106 |
| 119 | ERH       | 1.741958778 | 0.00630398  | 0.108848315 |
| 120 | LIMS1     | 1.738007164 | 0.006994866 | 0.111798456 |
| 121 | FTL       | 1.735750745 | 0.00347359  | 0.090568757 |
| 122 | CD68      | 1.733731266 | 0.016308055 | 0.140055385 |
| 123 | KCNJ10    | 1.731434483 | 3.10E-06    | 0.009640218 |

|     |           |             |             |             |
|-----|-----------|-------------|-------------|-------------|
| 124 | CD81      | 1.722429268 | 0.009814264 | 0.122019942 |
| 125 | PRKCB     | 1.720101276 | 0.001733413 | 0.080797522 |
| 126 | TAP1      | 1.716159761 | 0.003045127 | 0.089381319 |
| 127 | GYPE      | 1.714852425 | 0.000344271 | 0.055643815 |
| 128 | AGTPBP1   | 1.714823999 | 0.006519843 | 0.110222882 |
| 129 | POMP      | 1.710099297 | 0.014518274 | 0.136497006 |
| 130 | ARL2      | 1.707930435 | 0.004407451 | 0.096393361 |
| 131 | CRTAM     | 1.707894512 | 0.015933358 | 0.138862916 |
| 132 | FAS       | 1.706527675 | 0.002153217 | 0.082201067 |
| 133 | C1QB      | 1.698885565 | 0.000479818 | 0.059605989 |
| 134 | HIST1H2BL | 1.697279660 | 0.003761334 | 0.092378803 |
| 135 | HIST2H4B  | 1.694139056 | 0.010257514 | 0.123469201 |
| 136 | RNU4-1    | 1.693899145 | 0.000517506 | 0.060340969 |
| 137 | HIST1H4I  | 1.692124920 | 0.005122721 | 0.101892325 |
| 138 | SELL      | 1.689122058 | 0.008154554 | 0.115341606 |
| 139 | TLR8      | 1.689099516 | 0.017314885 | 0.142960638 |
| 140 | ABCD2     | 1.688857959 | 0.016944273 | 0.142120942 |
| 141 | C3orf38   | 1.688345403 | 0.000443792 | 0.05938864  |
| 142 | RNF13     | 1.688125943 | 0.002928807 | 0.088718267 |
| 143 | HLA-DMA   | 1.685960855 | 0.000448601 | 0.059393587 |
| 144 | PTPN1     | 1.682396811 | 0.001065472 | 0.071645798 |
| 145 | MYL12A    | 1.680948735 | 0.005475432 | 0.105309656 |
| 146 | ITGB2     | 1.680236266 | 2.34E-05    | 0.031108092 |
| 147 | ADAM19    | 1.679403549 | 0.001970854 | 0.081659013 |
| 148 | DDX5      | 1.675547957 | 0.008039477 | 0.115341606 |
| 149 | IRAK4     | 1.673954098 | 0.001163717 | 0.071703864 |
| 150 | PIAS1     | 1.665275665 | 0.015008782 | 0.137558831 |
| 151 | RASGRP1   | 1.662312866 | 0.003851125 | 0.092378803 |
| 152 | ATOX1     | 1.662308426 | 0.009457415 | 0.120536614 |

|     |          |             |             |             |
|-----|----------|-------------|-------------|-------------|
| 153 | LILRB4   | 1.661862580 | 0.003990915 | 0.092378803 |
| 154 | TOP2A    | 1.661787630 | 0.010381429 | 0.124077787 |
| 155 | SERPINE1 | 1.661315292 | 0.013600073 | 0.134214201 |
| 156 | DNM1P46  | 1.654518930 | 0.003404952 | 0.090463207 |
| 157 | MYL12B   | 1.653631304 | 0.008924732 | 0.118539411 |
| 158 | NR1H3    | 1.653113032 | 7.88E-05    | 0.049884668 |
| 159 | VCP      | 1.651442035 | 0.002029216 | 0.081659013 |
| 160 | STK17B   | 1.650746533 | 0.011583972 | 0.128376321 |
| 161 | UBD      | 1.647670114 | 0.003964954 | 0.092378803 |
| 162 | NAIP     | 1.642693978 | 0.015443122 | 0.138234205 |
| 163 | RPL4     | 1.640822498 | 0.01628134  | 0.140055385 |
| 164 | SNORD94  | 1.638986441 | 0.017020575 | 0.142331631 |
| 165 | RASSF4   | 1.638739442 | 0.001506103 | 0.07497069  |
| 166 | ADTRP    | 1.636723127 | 0.003720037 | 0.092378803 |
| 167 | HMOX1    | 1.636408070 | 8.76E-06    | 0.018168003 |
| 168 | MADD     | 1.635351176 | 0.00749992  | 0.114526556 |
| 169 | MSL2     | 1.634733016 | 0.019802915 | 0.149651222 |
| 170 | CBLL1    | 1.633764444 | 0.013563947 | 0.134187669 |
| 171 | OLA1     | 1.632046570 | 0.01182902  | 0.129094977 |
| 172 | LAP3     | 1.631293411 | 0.012346233 | 0.130880083 |
| 173 | TIFA     | 1.630751960 | 0.00589636  | 0.106984411 |
| 174 | SGPP2    | 1.625196655 | 0.000602789 | 0.061999351 |
| 175 | COPB1    | 1.624701000 | 0.011761195 | 0.128885247 |
| 176 | ATG7     | 1.623524085 | 0.000678552 | 0.065463661 |
| 177 | PNRC1    | 1.621727494 | 0.000555429 | 0.06046579  |
| 178 | FCRL3    | 1.621233559 | 0.016284156 | 0.140055385 |
| 179 | FAM91A1  | 1.619859288 | 0.02059429  | 0.14997261  |
| 180 | RNF144B  | 1.619689001 | 0.006236287 | 0.108666257 |
| 181 | IGF2R    | 1.616818805 | 0.003357737 | 0.090450683 |

|     |          |             |             |             |
|-----|----------|-------------|-------------|-------------|
| 182 | IREB2    | 1.615427348 | 0.003605928 | 0.091773104 |
| 183 | EIF3L    | 1.613704843 | 0.019389227 | 0.149353904 |
| 184 | CPM      | 1.613461671 | 0.013436464 | 0.13406093  |
| 185 | SCD      | 1.612815978 | 0.004027653 | 0.092378803 |
| 186 | TNS3     | 1.612315164 | 0.003239398 | 0.089883967 |
| 187 | NIN      | 1.612212673 | 0.008503752 | 0.116550323 |
| 188 | CAPG     | 1.611691405 | 0.005696979 | 0.105713659 |
| 189 | CYCS     | 1.611492794 | 0.009981202 | 0.122826729 |
| 190 | MPP1     | 1.611475306 | 0.004253864 | 0.094537196 |
| 191 | CTSH     | 1.607650694 | 0.006221122 | 0.108666257 |
| 192 | HIST1H4B | 1.607647852 | 0.018419044 | 0.145543797 |
| 193 | YWHAZ    | 1.606749166 | 0.01186112  | 0.129094977 |
| 194 | DECR1    | 1.605914207 | 0.007830219 | 0.115295005 |
| 195 | HNRNPLL  | 1.605162074 | 0.019521014 | 0.149353904 |
| 196 | CST3     | 1.604933014 | 0.000701652 | 0.066331864 |
| 197 | LRBA     | 1.603361794 | 0.019504844 | 0.149353904 |
| 198 | TRAT1    | 1.596587529 | 0.010262834 | 0.123469201 |
| 199 | HNRNPF   | 1.595108326 | 0.005169587 | 0.102447969 |
| 200 | HMGCS1   | 1.593274281 | 0.001297375 | 0.072826782 |
| 201 | ITM2B    | 1.591995253 | 0.009092308 | 0.119489941 |
| 202 | BMP2K    | 1.591044539 | 0.009755497 | 0.121653901 |
| 203 | ATP6V0E1 | 1.590953883 | 0.011978018 | 0.129721211 |
| 204 | SEC23B   | 1.590230344 | 0.010081278 | 0.123367794 |
| 205 | ASAH1    | 1.588297243 | 0.0146107   | 0.136497006 |
| 206 | HIST1H3J | 1.587711933 | 0.011501751 | 0.128264644 |
| 207 | ETS1     | 1.587349284 | 0.009518983 | 0.120884793 |
| 208 | IGSF6    | 1.584296910 | 0.006917276 | 0.111657501 |
| 209 | HIST1H3B | 1.581922559 | 0.017839833 | 0.143809556 |
| 210 | NCOA4    | 1.581615874 | 0.018752863 | 0.147153836 |

|     |           |             |             |             |
|-----|-----------|-------------|-------------|-------------|
| 211 | RSRP1     | 1.578722542 | 0.008240599 | 0.115341606 |
| 212 | COPA      | 1.577450426 | 0.00683152  | 0.111021531 |
| 213 | PRELID1   | 1.576148584 | 0.001049884 | 0.071645798 |
| 214 | TRAJ17    | 1.575449524 | 0.014004049 | 0.135736224 |
| 215 | ARL6IP5   | 1.575307092 | 0.000316083 | 0.055643815 |
| 216 | FTH1      | 1.574858380 | 0.019189598 | 0.148983964 |
| 217 | MARCKS    | 1.574286671 | 0.003006082 | 0.088963367 |
| 218 | TFEC      | 1.573175078 | 0.019784733 | 0.149651222 |
| 219 | ABI1      | 1.572926331 | 0.018069563 | 0.144247636 |
| 220 | RPS15A    | 1.572381635 | 0.008852428 | 0.118313181 |
| 221 | ACTR2     | 1.572059513 | 0.015514804 | 0.138234205 |
| 222 | CD4       | 1.569697956 | 0.009429867 | 0.120536614 |
| 223 | CORO1A    | 1.569502409 | 0.009714672 | 0.12137789  |
| 224 | DAZAP2    | 1.568960721 | 0.017043834 | 0.142331631 |
| 225 | UBE2J1    | 1.567815834 | 0.003997185 | 0.092378803 |
| 226 | POLK      | 1.567808505 | 0.001989814 | 0.081659013 |
| 227 | CHIT1     | 1.566364327 | 0.011538643 | 0.128353156 |
| 228 | RNASET2   | 1.565783744 | 0.001394793 | 0.073122324 |
| 229 | MBOAT1    | 1.565754125 | 0.009686047 | 0.12137789  |
| 230 | SNX1      | 1.565075491 | 0.006994312 | 0.111798456 |
| 231 | SLC25A46  | 1.563809526 | 0.005966126 | 0.107453742 |
| 232 | LINC00161 | 1.562951281 | 0.006684167 | 0.110486678 |
| 233 | CDS2      | 1.562130529 | 0.00880295  | 0.118313181 |
| 234 | SIRPG     | 1.561047205 | 0.001105617 | 0.071677338 |
| 235 | ATP6V1A   | 1.560317734 | 0.008848671 | 0.118313181 |
| 236 | SPTBN1    | 1.559566735 | 0.004678162 | 0.099694123 |
| 237 | IL2RG     | 1.556242732 | 0.01793565  | 0.144247636 |
| 238 | HNRNPC    | 1.555365368 | 0.015314841 | 0.138045884 |
| 239 | GLS       | 1.555102053 | 0.015995629 | 0.139016223 |

|     |           |             |             |             |
|-----|-----------|-------------|-------------|-------------|
| 240 | LPXN      | 1.554808224 | 0.003507191 | 0.090650839 |
| 241 | SFXN1     | 1.554108139 | 0.007683308 | 0.115167931 |
| 242 | BCL2A1    | 1.554090721 | 0.001395228 | 0.073122324 |
| 243 | ARPC1B    | 1.554069887 | 0.00048093  | 0.059605989 |
| 244 | HSP90AA6P | 1.553491070 | 0.020173145 | 0.149734356 |
| 245 | ELMO1     | 1.552779443 | 0.011487104 | 0.128216184 |
| 246 | HIST1H2AJ | 1.552204562 | 0.002741857 | 0.088150892 |
| 247 | TMEM243   | 1.552102223 | 0.010828141 | 0.125826355 |
| 248 | HIST1H2BC | 1.552074419 | 0.002094161 | 0.081659013 |
| 249 | PARP12    | 1.551571246 | 0.012467875 | 0.131491523 |
| 250 | SS18      | 1.550331175 | 0.001188645 | 0.071703864 |
| 251 | PSMD11    | 1.549461028 | 0.020297827 | 0.149734356 |
| 252 | OCIAD1    | 1.548767917 | 0.011335118 | 0.128012282 |
| 253 | HLA-DMB   | 1.548554175 | 0.019914568 | 0.149734356 |
| 254 | FAM26F    | 1.547851220 | 0.002939433 | 0.088718267 |
| 255 | SMIM15    | 1.547657910 | 0.01741305  | 0.142960638 |
| 256 | LOC400590 | 1.546678241 | 0.004067322 | 0.092378803 |
| 257 | ANAPC16   | 1.546462104 | 0.004145706 | 0.092897186 |
| 258 | KMO       | 1.545830110 | 0.012431136 | 0.131444233 |
| 259 | PIK3AP1   | 1.542686656 | 0.009972556 | 0.122826729 |
| 260 | LSM2      | 1.542454507 | 0.00310243  | 0.089648643 |
| 261 | UBE2G1    | 1.541639689 | 0.007750747 | 0.115295005 |
| 262 | FLNA      | 1.540982013 | 0.007493725 | 0.114526556 |
| 263 | PPP1R3C   | 1.540564438 | 0.003793805 | 0.092378803 |
| 264 | TCN2      | 1.540537670 | 0.00084452  | 0.068813834 |
| 265 | CD27      | 1.540384781 | 0.000130593 | 0.053344665 |
| 266 | LARP4B    | 1.539952048 | 0.017405201 | 0.142960638 |
| 267 | TIPARP    | 1.539780965 | 0.005527653 | 0.105346258 |
| 268 | MMP9      | 1.539625200 | 0.011441034 | 0.128109323 |

|     |           |             |             |             |
|-----|-----------|-------------|-------------|-------------|
| 269 | MTA2      | 1.538890570 | 0.001411259 | 0.073122324 |
| 270 | FOXB2     | 1.538722262 | 0.005500148 | 0.105309656 |
| 271 | UBB       | 1.535056844 | 0.002773338 | 0.088150892 |
| 272 | CSNK2B    | 1.534564147 | 0.015244278 | 0.138045884 |
| 273 | MORF4L1   | 1.533566310 | 0.004101893 | 0.092559764 |
| 274 | TRAFD1    | 1.533369055 | 0.010556955 | 0.124718574 |
| 275 | AP2B1     | 1.533223933 | 0.014026311 | 0.135824769 |
| 276 | GPX7      | 1.532662262 | 0.007046882 | 0.111798456 |
| 277 | EXOSC9    | 1.532228674 | 0.008019216 | 0.115341606 |
| 278 | NBN       | 1.531217575 | 0.020449895 | 0.149734356 |
| 279 | HLA-C     | 1.530921502 | 0.000483731 | 0.059605989 |
| 280 | SIT1      | 1.530522516 | 0.000405099 | 0.058808812 |
| 281 | TSPAN14   | 1.529186596 | 0.002476795 | 0.087075086 |
| 282 | PFN1      | 1.527712050 | 0.012035186 | 0.129721211 |
| 283 | NEIL3     | 1.526016304 | 0.00854331  | 0.116711852 |
| 284 | CSTB      | 1.524864739 | 0.009075245 | 0.119455847 |
| 285 | FAM96A    | 1.524345967 | 0.010304587 | 0.123469201 |
| 286 | CTSD      | 1.520507871 | 0.006415387 | 0.109672725 |
| 287 | ATF7IP2   | 1.520044905 | 0.004989943 | 0.100820117 |
| 288 | IL2RA     | 1.516209255 | 0.010191606 | 0.123469201 |
| 289 | HIST1H2AB | 1.515801447 | 0.012921411 | 0.132733421 |
| 290 | USP4      | 1.514163876 | 0.012847456 | 0.132733421 |
| 291 | EEF2      | 1.513126407 | 0.006256997 | 0.108666257 |
| 292 | LITAF     | 1.512016288 | 0.002027995 | 0.081659013 |
| 293 | BASP1     | 1.511973241 | 0.00026951  | 0.055643815 |
| 294 | ATP5G3    | 1.511687303 | 0.00523705  | 0.103128054 |
| 295 | C16orf87  | 1.511163505 | 0.010633695 | 0.124973614 |
| 296 | VEZT      | 1.509201006 | 0.005753538 | 0.106238578 |
| 297 | MDH1      | 1.507802990 | 0.014375376 | 0.136403828 |



|     |        |             |             |             |
|-----|--------|-------------|-------------|-------------|
| 298 | LGALS2 | 1.506903365 | 0.004120262 | 0.092559764 |
| 299 | ACP2   | 1.506858127 | 0.013812085 | 0.134530201 |
| 300 | CNOT7  | 1.506624790 | 0.017685102 | 0.143623593 |
| 301 | CNDP2  | 1.506378277 | 0.00451284  | 0.097337739 |
| 302 | CARD11 | 1.503767626 | 0.001849302 | 0.081447106 |
| 303 | AIF1   | 1.503359045 | 0.004798258 | 0.099965614 |
| 304 | XRN2   | 1.500567729 | 0.018008621 | 0.144247636 |

**Table S6. Recurrent copy number aberrations occurring in at least 20% of Nodal-group and Extranodal-group cases.**

**A) Recurrent loss in Nodal group cases (n=12)**

| chr | start     | end       | cytoband    | Frequency (%) | gene count | gene name (selected list)                                                                                                                                                  |
|-----|-----------|-----------|-------------|---------------|------------|----------------------------------------------------------------------------------------------------------------------------------------------------------------------------|
| 3   | 162347085 | 162672041 | chr3q26.1   | 58            | 0          |                                                                                                                                                                            |
| 14  | 22328365  | 23000062  | chr14q11.2  | 100           | 50         | TRAJ60, TRDV2, TRDV3, TRDJ4, TRDV1, TRD@, TRAV38-1, TRAV35, TRAV36DV7, TRAV40, TRAV41, TRAV39, TRAV33, TRAV34, TRAV12-2, TRAV26-2, TRAV26-1, TRAV28, TRAV29DV5, TRAV32,... |
| 22  | 24346428  | 24390318  | chr22q11.23 | 33            | 6          | LOC768328, GSTTP2, LOC391322, LOC100420769, GSTTP1, GSTT1                                                                                                                  |

**B) Recurrent loss in Extranodal group cases (n=29)**

| chr | start     | end       | cytoband        | Frequency (%) | gene count | gene name (Selected list)                                           |
|-----|-----------|-----------|-----------------|---------------|------------|---------------------------------------------------------------------|
| 3   | 162373665 | 162659705 | chr3q26.1       | 34            | 0          |                                                                     |
| 6   | 124681503 | 125097427 | chr6q22.31      | 21            | 1          | NKAIN2                                                              |
| 6   | 132600719 | 132874814 | chr6q23.2       | 21            | 5          | TAAR8, RPL21P66, STX7, MOXD1, TAAR9                                 |
| 6   | 135057244 | 135739355 | chr6q23.2-q23.3 | 21            | 8          | HBS1L, MYB, MEMO1P2, ALDH8A1, MIR3662, AHI1, LOC100420631, MIR548A2 |

|    |           |           |                 |       |    |                                                                                                                                                                                                             |
|----|-----------|-----------|-----------------|-------|----|-------------------------------------------------------------------------------------------------------------------------------------------------------------------------------------------------------------|
| 6  | 136625541 | 147583868 | chr6q23.3-q24.3 | 21    | 90 | ZC2HC1B, LOC100507477, MRPL42P3, PHACTR2, ABRACL, LOC100131041, LOC100507462, NMBR, FLJ46906, HYMAI, PEX7, RPS3AP23, LOC100130476, LOC100129577, RAB32, LOC100507390, FUCA2, RPL35AP3, TNFAIP3, IL22RA2,... |
| 6  | 160186920 | 162627290 | chr6q25.3-q26   | 21    | 19 | SLC22A2, MAS1, LPA, LOC729603, AGPAT4-IT1, SNORA20, IGF2R, PLG, MRPL18, PNLDC1, MAP3K4, ACAT2, SNORA29, SLC22A3, SLC22A1, PARK2, LPAL2, AGPAT4, TCP1                                                        |
| 9  | 21993468  | 22014524  | chr9p21.3       | 21    | 4  | UBA52P6, CDKN2B-AS1, CDKN2B, CDKN2A                                                                                                                                                                         |
| 22 | 24346428  | 24390318  | chr22q11.23     | 48-59 | 6  | LOC768328, GSTTP2, LOC391322, LOC100420769, GSTTP1, GSTT1                                                                                                                                                   |

### C) Recurrent gains in Extranodal group (n=29)

| chr | start     | end       | cytoband      | Frequency (%) | gene count | gene name (selected list)                                                                                                                                                  |
|-----|-----------|-----------|---------------|---------------|------------|----------------------------------------------------------------------------------------------------------------------------------------------------------------------------|
| 1   | 156037357 | 184599514 | chr1q22-q25.3 | 28            | 489        | TIPRL, METTL13, FMO11P, SONP1, CD48, SHCBP1L, SDCCAG3P2, NIT1, XCL1, FMO9P, RPS17P6, RPL4P3, RPS15P3, LOC391136, SLC19A2, OR6P1, QRSL1P1, ARPC5, LOC100505686, OR10J9P,... |

|   |           |           |                  |    |     |                                                                                                                                                                                              |
|---|-----------|-----------|------------------|----|-----|----------------------------------------------------------------------------------------------------------------------------------------------------------------------------------------------|
| 1 | 185727070 | 249212878 | chr1q25.3-q44    | 28 | 754 | PPP1R15B, OCLM, C1orf106, LOC100419489, NVL, KCNK2, KCNK1, SNORA77, MIR4742, ZNF124, MYOG, SUSD4, ZNF670, MIR135B, NID1, SPHAR, LEFTY1, LOC100130137, PLEKHA6, C1orf27,...                   |
| 2 | 143731244 | 145490269 | chr2q22.2-q22.3  | 21 | 5   | KYNU, DKFZp686O1327, ARHGAP15, LOC100505471, ZEB2                                                                                                                                            |
| 2 | 158177489 | 158422586 | chr2q24.1        | 21 | 4   | ERMN, CYTIP, LOC728066, ACVR1C                                                                                                                                                               |
| 2 | 161181830 | 161473973 | chr2q24.2        | 21 | 3   | LOC100419108, RBMS1, MIR4785                                                                                                                                                                 |
| 2 | 162139812 | 162414307 | chr2q24.2        | 21 | 4   | TBR1, PSMD14, AHCTF1P1, LOC100506055                                                                                                                                                         |
| 2 | 195980760 | 198621506 | chr2q32.3-q33.1  | 24 | 26  | SLC39A10, ATP5G2P3, LOC729342, GTF3C3, LOC100419110, RFTN2, HSPD1, E2F3P2, CCDC150, HSPE1-MOB4, LOC391470, HECW2, LOC100130452, C2orf66, PGAP1, BOLL, COQ10B, HSPE1, LOC100507039, MARS2,... |
| 2 | 199506556 | 199766349 | chr2q33.1        | 21 | 0   |                                                                                                                                                                                              |
| 6 | 32340236  | 32582736  | chr6p21.32       | 21 | 2   | HLA-DRB6, HLA-DRB5                                                                                                                                                                           |
| 7 | 88259445  | 90063761  | chr7q21.13       | 21 | 9   | STEAP2, EEF1A1P28, GTPBP10, STEAP1, C7orf63, CLDN12, ZNF804B, C7orf62, DPY19L2P4                                                                                                             |
| 7 | 90372863  | 91184277  | chr7q21.13-q21.2 | 21 | 3   | NIPA2P1, CDK14, FZD1                                                                                                                                                                         |

|    |           |           |                 |    |    |                                                                                                                                                                                                        |
|----|-----------|-----------|-----------------|----|----|--------------------------------------------------------------------------------------------------------------------------------------------------------------------------------------------------------|
| 7  | 92203716  | 94435106  | chr7q21.2-q21.3 | 21 | 25 | CCDC132, RPS27P17, TFPI2, RPS3AP25, CASD1, FAM133B, ATP5F1P2, MIR653, CALCR, CDK6, LOC100506027, COL1A2, SAMD9, HEPACAM2, SAMD9L, SGCE, MIR489, GRPEL2P3, RN7SL7P, BET1,...                            |
| 7  | 99816878  | 99981895  | chr7q22.1       | 21 | 6  | GATS, PVRIG, SPDYE3, PMS2P1, PILRA, PILRB                                                                                                                                                              |
| 7  | 103871529 | 104154069 | chr7q22.2       | 21 | 1  | LHFPL3                                                                                                                                                                                                 |
| 7  | 104245132 | 104619563 | chr7q22.2-q22.3 | 21 | 4  | EIF4BP6, LOC645591, LHFPL3, LOC723809                                                                                                                                                                  |
| 7  | 148158904 | 150483512 | chr7q36.1       | 21 | 53 | GIMAP5, GIMAP2, RNU7-20P, ZNF212, REPIN1, ALDH7A1P3, ZNF777, GIMAP7, LOC643438, LOC100128542, CUL1, LRRRC61, COX6B1P1, PDIA4, KRBA1, ACTR3C, ZNF467, ZNF862, GIMAP1, LOC728743,...                     |
| 7  | 151699597 | 159118443 | chr7q36.1-q36.3 | 24 | 56 | RNF32, LOC100132707, ACTR3B, RPS27AP12, XRCC2, MIR595, GALNT11, LMBR1, RPL21P76, LOC100506585, RPL26P23, LOC154822, LOC100506557, WDR60, YBX1P4, LOC100506380, LOC777650, SHH, UBE3C, LOC100506534,... |
| 11 | 128383077 | 128519816 | chr11q24.3      | 21 | 1  | ETS1                                                                                                                                                                                                   |
| 13 | 48910204  | 49004132  | chr13q14.2      | 24 | 2  | RB1, LPAR6                                                                                                                                                                                             |

|    |          |          |                     |    |    |                                                                                                                                                                                                     |
|----|----------|----------|---------------------|----|----|-----------------------------------------------------------------------------------------------------------------------------------------------------------------------------------------------------|
| 17 | 45196190 | 47450057 | chr17q21.32-7q21.33 | 21 | 68 | MRPL45P2, HOXB-AS3, NPEPPS, MIR196A1, LOC100506252, LOC100303748, LOC100506325, KPNB1, UBE2Z, ITGB3, LOC100506228, GIP, TBKBP1, LOC100421523, MYL4, SKAP1, MIR10A, LOC100506373, NFE2L1, ATP5G1,... |
| 17 | 50106958 | 50134132 | chr17q21.33         | 21 | 1  | CA10                                                                                                                                                                                                |
| 17 | 57822608 | 58015149 | chr17q23.1          | 21 | 6  | RPS6KB1, RPS29P21, NDUFB8P2, TUBD1, MIR21, VMP1                                                                                                                                                     |
| 17 | 59917389 | 60017888 | chr17q23.2          | 21 | 2  | INTS2, BRIP1                                                                                                                                                                                        |
| 17 | 65064908 | 65309815 | chr17q24.2          | 21 | 2  | HELZ, RPL36AP48                                                                                                                                                                                     |
| 17 | 66011057 | 66891543 | chr17q24.2          | 21 | 15 | KPNA2, WIPI1, LOC651250, ARSG, MIR635, FAM20A, LOC440461, AMZ2, ABCA8, PRKAR1A, LOC100418928, SLC16A6, SH3GL1P3, LOC732538, LOC100499466                                                            |
| 17 | 73230856 | 73509541 | chr17q25.1          | 21 | 11 | MIF4GD, KIAA0195, NUP85, GRB2, LOC100287042, RPL36AP7, GGA3, MIR3678, SLC25A19, MRPS7, CASKIN2                                                                                                      |
| 17 | 78244300 | 78513632 | chr17q25.3          | 21 | 6  | LOC100294362, NPTX1, MIR4730, LOC100507440, ENDOV, RNF213                                                                                                                                           |

Chr, chromosome

**Table S7. Results of TCR loci in all samples tested with OncoScan**

| <b>TCR loci deletion status of TNKL samples</b> |                     |                               |                              |                               |                               |
|-------------------------------------------------|---------------------|-------------------------------|------------------------------|-------------------------------|-------------------------------|
| <b>Sample</b>                                   | <b>Cell Lineage</b> | <b>TCR<math>\alpha</math></b> | <b>TCR<math>\beta</math></b> | <b>TCR<math>\gamma</math></b> | <b>TCR<math>\delta</math></b> |
| <b>A1</b>                                       | T                   | -1                            |                              |                               | -1                            |
| <b>MD04</b>                                     | Indeterminate       |                               |                              |                               |                               |
| <b>MD05*</b>                                    | Indeterminate       |                               |                              | -1                            |                               |
| <b>MD10</b>                                     | T                   | -1                            |                              |                               | -1                            |
| <b>MD11*</b>                                    | Indeterminate       |                               |                              |                               |                               |
| <b>MD15*</b>                                    | Indeterminate       | -1                            |                              |                               |                               |
| <b>NKTL22</b>                                   | Indeterminate       |                               |                              |                               |                               |
| <b>NKTL23A</b>                                  | T                   | -1/-2                         |                              |                               | -2                            |
| <b>NKTL24</b>                                   | Indeterminate       | 1                             |                              |                               |                               |
| <b>NKTL27A</b>                                  | Indeterminate       |                               |                              |                               |                               |
| <b>NKTL36*</b>                                  | NK                  |                               |                              |                               |                               |
| <b>NKTL40</b>                                   | T                   | -1                            |                              |                               | -1                            |
| <b>NKTL41*</b>                                  | Indeterminate       |                               |                              |                               |                               |
| <b>NKTL43*</b>                                  | Indeterminate       |                               |                              | -1                            |                               |
| <b>NKTL50*</b>                                  | Indeterminate       | -1                            |                              |                               |                               |
| <b>NKTL52*</b>                                  | Indeterminate       |                               |                              |                               |                               |
| <b>NKTL53</b>                                   | Indeterminate       |                               |                              |                               |                               |

|                |               |       |    |  |    |
|----------------|---------------|-------|----|--|----|
| <b>NKTL59*</b> | Indeterminate | -1/-2 |    |  | -2 |
| <b>NKTL60</b>  | T             | -1/-2 |    |  | -2 |
| <b>T114</b>    | T             | -1    | -1 |  | -1 |
| <b>T202</b>    | T             | -2    |    |  | -2 |
| <b>T241</b>    | NK            |       |    |  |    |
| <b>T242</b>    | T             | -1    |    |  | -1 |
| <b>T25</b>     | T             |       |    |  |    |
| <b>TNK1*</b>   | Indeterminate | -1    |    |  | -1 |
| <b>TNK10</b>   | T             | -1/-2 |    |  | -2 |
| <b>TNK3</b>    | T             | -1    |    |  | -1 |
| <b>TNK4</b>    | T             | -2    | -1 |  | -2 |
| <b>TNK6</b>    | T             | -1    |    |  | -1 |
| <b>TNK9</b>    | T             | -1/-2 |    |  | -2 |
| <b>TW7</b>     | NK            |       |    |  |    |
| <b>TW13*</b>   | Indeterminate |       |    |  |    |
| <b>TW22</b>    | T             |       |    |  |    |
| <b>TW26*</b>   | Indeterminate |       |    |  |    |
| <b>TW27*</b>   | Indeterminate |       |    |  |    |
| <b>TW29*</b>   | Indeterminate |       |    |  |    |
| <b>TW33</b>    | NK            |       |    |  |    |
| <b>TW34*</b>   | Indeterminate |       |    |  |    |



|             |    |  |  |  |  |
|-------------|----|--|--|--|--|
| <b>TW37</b> | NK |  |  |  |  |
| <b>TW38</b> | NK |  |  |  |  |
| <b>TW39</b> | T  |  |  |  |  |

| <b>Diagnosis</b>    | <b>Diagnostic category</b> | <b>TCRA</b> | <b>TCRB</b> | <b>TCRG</b> | <b>TCRD</b> |
|---------------------|----------------------------|-------------|-------------|-------------|-------------|
| <b>AITL</b>         | T cell lymphoma            |             |             |             |             |
| <b>ALCL</b>         | T cell lymphoma            | -1          |             |             | -1          |
| <b>PTCL</b>         | T cell lymphoma            | -1          |             |             | -1          |
| <b>Tonsil</b>       | Benign                     |             |             |             |             |
| <b>Tonsil</b>       | Benign                     |             |             |             |             |
| <b>Lymph Node</b>   | Benign                     |             |             |             |             |
| <b>NK cells (1)</b> | Benign                     |             |             |             |             |
| <b>NK cells (2)</b> | Benign                     |             |             |             |             |
| <b>T cells (1)</b>  | Benign                     | -1/-2       | -1          |             | -2          |
| <b>T cells (2)</b>  | Benign                     | -1/-2       | -1          | -1          | -2          |
| <b>B cells (1)</b>  | Benign                     |             |             |             |             |
| <b>B cells (2)</b>  | Benign                     |             |             |             |             |
| <b>PTCL</b>         | T cell lymphoma            | -1/-2       |             |             | -2          |
| <b>AITL</b>         | T cell lymphoma            | -1          |             |             | -1          |
| <b>ALCL</b>         | T cell lymphoma            | -2          | -2          |             | -2          |

MCL; mantle cell lymphoma, MZL; marginal zone lymphoma, AITL; angioimmunoblastic T cell lymphoma, DLBCL; diffuse large B cell lymphoma, FL; follicular lymphoma, ALCL; anaplastic T cell lymphoma, PTCL; peripheral T cell lymphoma.

\* denotes cases with absence of TCRG/TCRB expression and lacking TCR clonality data and. COO assigned based on combination of CD56 expression and/or TCR loci information

**Table S8. Association between TCR loci loss and cell lineage**

| P<0.0001           | TCR loci |        |    |
|--------------------|----------|--------|----|
|                    | Loss     | Intact |    |
| <b>Lineage</b>     |          |        |    |
| T-origin (n=24)    | 20       | 4      | 24 |
| Non-T-origin (n=9) | 0        | 9      | 9  |
|                    | 20       | 13     | 33 |

T-origin samples includes TNKL of T-origin (n=16), PTCL (N=6) and normal T-cells (n=2). Non-T samples include TNKL of NK origin (n=5), normal B cells (n=2) and normal NK cells (n=2). Only those TNKL cases with complete TCRB/TCRG IHC and clonality data were included for this analysis. TNKL cases denoted with (\*) in supplemental Table 1 were excluded for this analysis.

**Table S9. Differentially expressed genes (DEG) between the Nodal-group and lymph node control tissues ( $p < 0.05$ , False Discovery Rate (FDR)  $< 0.15$  and fold change  $\geq 4.0$ )**

**A) Genes downregulated in nodal compared to control cases**

| <b>No.</b> | <b>Symbol</b> | <b>Fold change</b> | <b>p-value</b> | <b>FDR</b> |
|------------|---------------|--------------------|----------------|------------|
| 1          | PSG10P        | 12.0893            | 0.005268       | 0.086546   |
| 2          | SNX29P1       | 8.982119           | 0.000233       | 0.027088   |
| 3          | SNORD38A      | 8.437966           | 0.001454       | 0.057091   |
| 4          | SNORD115-24   | 7.990969           | 0.023649       | 0.127334   |
| 5          | SNORD117      | 6.990204           | 0.006598       | 0.090213   |
| 6          | MIR30C2       | 5.843239           | 0.00201        | 0.062918   |
| 7          | SNORD55       | 5.723527           | 0.002954       | 0.07092    |
| 8          | IGHV3OR16-7   | 5.151226           | 0.029267       | 0.134647   |
| 9          | SNORD42A      | 4.750073           | 0.029835       | 0.13551    |
| 10         | SCARNA4       | 4.495444           | 0.000126       | 0.022036   |
| 11         | MIR622        | 4.422818           | 0.000944       | 0.050073   |
| 12         | ZNF709        | 4.405266           | 0.007408       | 0.092071   |
| 13         | PRADC1        | 4.338643           | 0.006369       | 0.089917   |
| 14         | MIR30C1       | 4.230802           | 0.013879       | 0.109141   |
| 15         | RNASE1        | 4.051542           | 0.000133       | 0.022392   |

**B) Genes upregulated in nodal compared to control cases**

| No. | Symbol     | Fold change | p-value     | FDR         |
|-----|------------|-------------|-------------|-------------|
| 1   | RSPH10B2   | 19.5085     | 0.021828074 | 0.123967389 |
| 2   | CXCL10     | 18.0743     | 1.78E-08    | 0.000213117 |
| 3   | SENP3      | 17.6259     | 0.001889945 | 0.061785449 |
| 4   | HIST2H2AA3 | 14.3689     | 0.000439776 | 0.038061433 |
| 5   | CXCL9      | 14.2346     | 4.74E-06    | 0.007119642 |
| 6   | KLRC2      | 13.5148     | 0.000854121 | 0.049111583 |
| 7   | GZMK       | 11.5879     | 9.68E-05    | 0.019022759 |
| 8   | CENPS      | 9.3318      | 0.003408028 | 0.07443628  |
| 9   | OR2W3      | 9.3005      | 0.028342249 | 0.133077304 |
| 10  | LGALS9C    | 9.1842      | 0.001023157 | 0.051692812 |
| 11  | FCGR3A     | 8.9654      | 7.90E-07    | 0.003155627 |
| 12  | SNORD56B   | 8.9202      | 0.004784764 | 0.083513677 |
| 13  | GZMA       | 8.8795      | 5.94E-07    | 0.003155627 |
| 14  | SNORD102   | 8.8791      | 0.019856982 | 0.121471441 |
| 15  | IFNG       | 8.5649      | 5.83E-05    | 0.016269408 |
| 16  | FCER1G     | 8.4917      | 0.000104836 | 0.019953767 |
| 17  | GBP1       | 8.4726      | 0.000173246 | 0.024348196 |
| 18  | SNORA22    | 8.3726      | 0.006508978 | 0.089916595 |

|    |           |        |             |             |
|----|-----------|--------|-------------|-------------|
| 19 | COX7B     | 8.2459 | 2.73E-05    | 0.011215562 |
| 20 | GBP5      | 7.9687 | 3.66E-05    | 0.012927228 |
| 21 | TXN       | 7.6375 | 4.93E-06    | 0.007119642 |
| 22 | SNORA24   | 7.5750 | 0.015877016 | 0.113170809 |
| 23 | MT1H      | 7.4586 | 1.23E-06    | 0.003627475 |
| 24 | HSPE1     | 7.1976 | 0.002323169 | 0.064361587 |
| 25 | HIST1H3G  | 6.9808 | 0.001073488 | 0.052671265 |
| 26 | CPT1B     | 6.7547 | 0.03103765  | 0.137502892 |
| 27 | HIST1H2BI | 6.6695 | 0.000459019 | 0.038061433 |
| 28 | CXCL11    | 6.4341 | 3.48E-05    | 0.012927228 |
| 29 | RNU4-1    | 6.3379 | 0.043980613 | 0.156620112 |
| 30 | WARS      | 6.2585 | 8.12E-06    | 0.007119642 |
| 31 | SAT1      | 6.2318 | 0.000146912 | 0.023399989 |
| 32 | DHRXS     | 6.2035 | 0.012321809 | 0.105083179 |
| 33 | S100A8    | 5.9660 | 0.000131764 | 0.022392449 |
| 34 | IDO1      | 5.8322 | 9.01E-06    | 0.007119642 |
| 35 | SNORD61   | 5.6844 | 0.02161399  | 0.123917586 |
| 36 | APOBEC3G  | 5.5190 | 0.005456938 | 0.087327309 |
| 37 | PSMB4     | 5.5175 | 0.001847851 | 0.061785449 |
| 38 | SPECC1L   | 5.5057 | 0.031145118 | 0.137694111 |

|    |            |        |             |             |
|----|------------|--------|-------------|-------------|
| 39 | S100A9     | 5.4266 | 4.22E-05    | 0.014065098 |
| 40 | CORO7      | 5.3699 | 0.034331614 | 0.141954793 |
| 41 | CTSL       | 5.3103 | 1.81E-05    | 0.00869966  |
| 42 | GBP2       | 5.2105 | 1.37E-05    | 0.007651241 |
| 43 | HCRP1      | 5.1754 | 0.001507048 | 0.05773467  |
| 44 | SPDYE6     | 5.0042 | 0.036474064 | 0.145253709 |
| 45 | FRG1JP     | 4.9858 | 0.045729097 | 0.157930768 |
| 46 | GYG1       | 4.9725 | 9.10E-05    | 0.01865914  |
| 47 | CD163      | 4.9649 | 1.04E-05    | 0.007119642 |
| 48 | TLR8       | 4.9199 | 4.90E-05    | 0.015072634 |
| 49 | AGAP6      | 4.8820 | 0.019330668 | 0.120589689 |
| 50 | PRELID3B   | 4.8173 | 0.035477918 | 0.144200738 |
| 51 | FTL        | 4.7947 | 0.003587532 | 0.07603778  |
| 52 | SERPINB1   | 4.7894 | 0.000780782 | 0.047067147 |
| 53 | GZMB       | 4.6843 | 4.35E-06    | 0.007119642 |
| 54 | ANKRD36BP1 | 4.6798 | 0.007724414 | 0.092070695 |
| 55 | CCL4       | 4.6704 | 1.13E-05    | 0.007119642 |
| 56 | PTGES3     | 4.5630 | 0.001322991 | 0.056859941 |
| 57 | HIST1H2AC  | 4.5564 | 0.005652328 | 0.087506193 |
| 58 | ATP5F1     | 4.5153 | 0.003510479 | 0.07603778  |

|    |          |        |             |             |
|----|----------|--------|-------------|-------------|
| 59 | MT2A     | 4.5027 | 0.00020827  | 0.026107298 |
| 60 | LYZ      | 4.4466 | 0.003933849 | 0.079145331 |
| 61 | ANKRD22  | 4.4058 | 0.001170169 | 0.053760317 |
| 62 | ANXA5    | 4.3839 | 0.000672738 | 0.043742579 |
| 63 | SLC25A52 | 4.3747 | 0.036974236 | 0.146177536 |
| 64 | UBC      | 4.3711 | 0.012011585 | 0.104714687 |
| 65 | ADAMDEC1 | 4.3227 | 0.000524356 | 0.039544241 |
| 66 | SCD      | 4.2805 | 1.10E-05    | 0.007119642 |
| 67 | ZBED6    | 4.2675 | 0.01229404  | 0.105083179 |
| 68 | PSTPIP2  | 4.2620 | 0.000403487 | 0.036932771 |
| 69 | HSP90AA1 | 4.2509 | 0.005753436 | 0.087610681 |
| 70 | LDHA     | 4.2420 | 0.001204186 | 0.054571342 |
| 71 | CKLF     | 4.2401 | 0.002395472 | 0.06453272  |
| 72 | HSP90B1  | 4.2394 | 0.010676276 | 0.101040857 |
| 73 | ANP32E   | 4.2187 | 0.000419867 | 0.037413247 |
| 74 | ZCRB1    | 4.1548 | 0.004495087 | 0.082786778 |
| 75 | RAB1A    | 4.1052 | 0.00364067  | 0.07603778  |
| 76 | SLC39A8  | 4.0932 | 1.46E-05    | 0.007651241 |
| 77 | HIST2H4A | 4.0659 | 0.047183176 | 0.159291067 |
| 78 | DDIT4    | 4.0633 | 9.46E-06    | 0.007119642 |

|    |        |        |             |             |
|----|--------|--------|-------------|-------------|
| 79 | SLAMF7 | 4.0552 | 0.000344603 | 0.033850156 |
| 80 | HSPA8  | 4.0377 | 0.005683418 | 0.087506193 |

**Table S10. Gene set enrichment analysis showing hallmark gene sets enriched in N-group compared to normal lymph nodes (p <0.05 and FDR < 0.2)**

| <b>NAME</b>                      | <b>SIZE</b> | <b>Normalized Enrichment Score</b> | <b>p-value</b> | <b>FDR</b> |
|----------------------------------|-------------|------------------------------------|----------------|------------|
| HALLMARK_G2M_CHECKPOINT          | 198         | 1.510794                           | 0.00618392     | 0.18899    |
| HALLMARK_ALLOGRAFT_REJECTION     | 200         | 1.470902                           | 0.01670312     | 0.115202   |
| HALLMARK_MTORC1_SIGNALING        | 198         | 1.450891                           | 0.01779644     | 0.098907   |
| HALLMARK_FATTY_ACID_METABOLISM   | 155         | 1.49483                            | 0.01947286     | 0.171056   |
| HALLMARK_IL6_JAK_STAT3_SIGNALING | 87          | 1.491728                           | 0.02123515     | 0.142304   |
| HALLMARK_E2F_TARGETS             | 198         | 1.468775                           | 0.02297243     | 0.10512    |
| HALLMARK_APOPTOSIS               | 159         | 1.423059                           | 0.02585867     | 0.129119   |
| HALLMARK_MYC_TARGETS_V1          | 194         | 1.417661                           | 0.03167238     | 0.119439   |
| HALLMARK_MYC_TARGETS_V2          | 58          | 1.488854                           | 0.03328738     | 0.105651   |
| HALLMARK_COMPLEMENT              | 194         | 1.453511                           | 0.03343109     | 0.114747   |
| HALLMARK_INFLAMMATORY_RESPONSE   | 197         | 1.490906                           | 0.04525237     | 0.120396   |
| HALLMARK_GLYCOLYSIS              | 198         | 1.403631                           | 0.04927255     | 0.132971   |



## Supplemental Figures

**Figure S1**

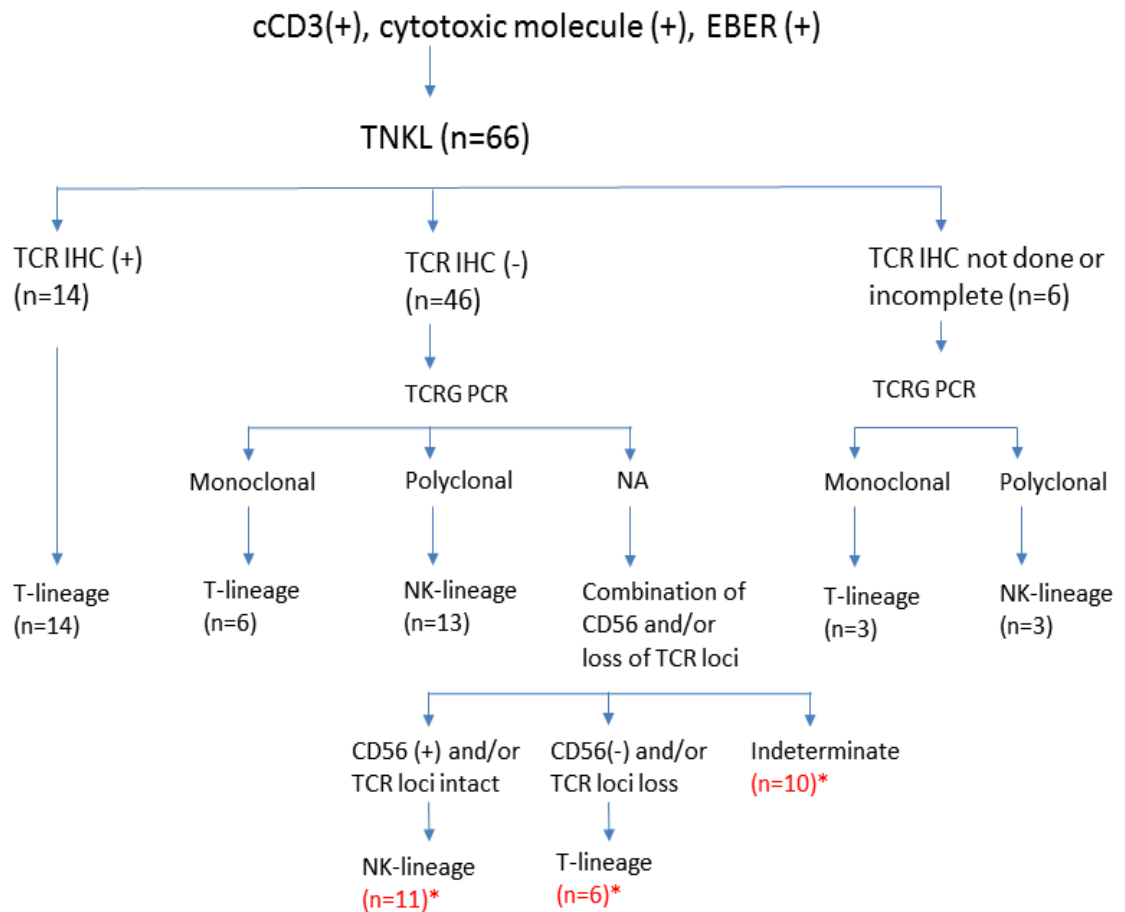

IHC; immunohistochemistry, PCR; polymerase chain reaction, NA; not available (+); positive expression, (-); negative expression, (\*) cases denote those using TCR loci data to assign lineage, these cases excluded for TCR loci and lineage analysis

**Figure S1.** Flow chart illustrating the determination of T vs NK-cell lineage based on the expression of TCRB and TCRG immunohistochemistry and clonality for TCRG gene rearrangement by PCR. Cases with negative expression for TCRB/TCRG IHC and lacking clonality data had lineage assignment based on combination of CD56 expression and TCR loci data.

**Figure S2**

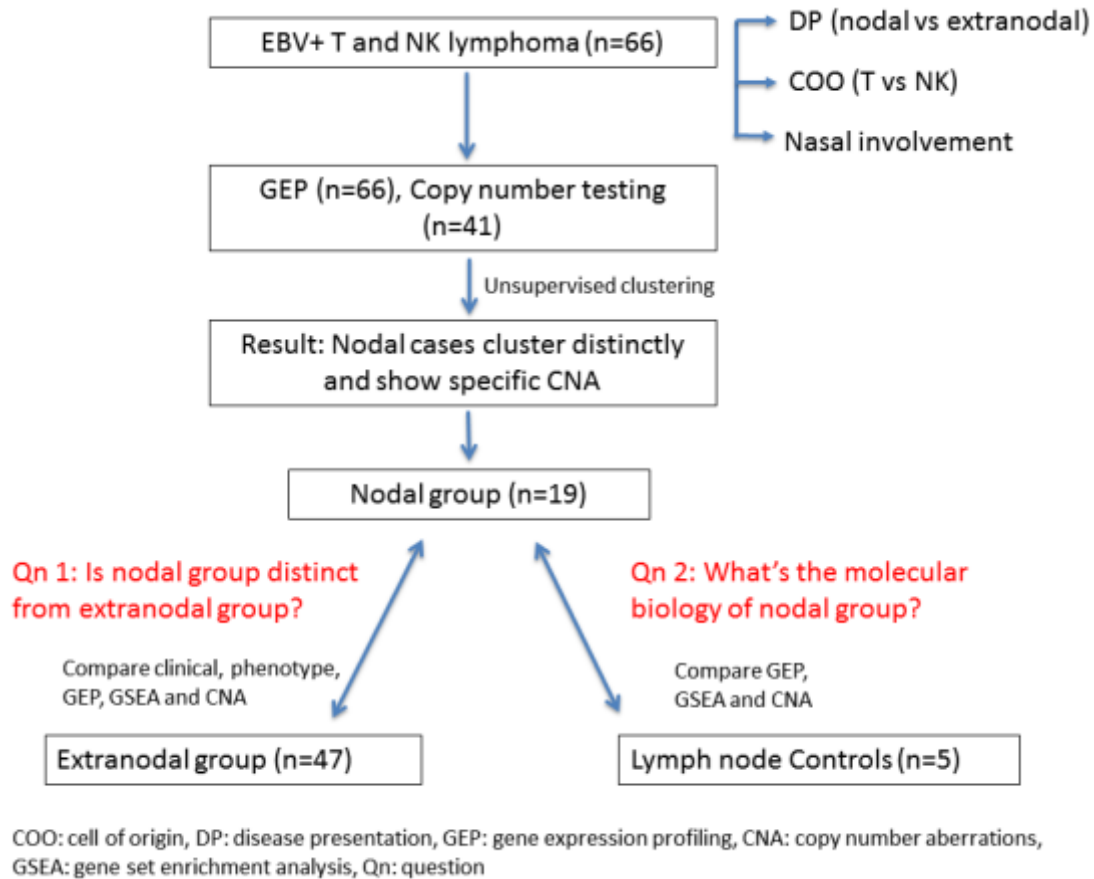

**Figure S2** illustrating overall study design. It is currently unclear whether the group of EBV-positive T/NK cell lymphoma with nodal presentation (nodal TNKL) represents a distinct entity and the relationship with extranodal NK/T cell lymphoma, nasal type (ENKTL) remains controversial, we undertook this multicenter study in an attempt to better understand the relationship of nodal TNKL with ENKTL and analyzed the molecular biology of nodal TNKL. We collected a total of 66 samples of EBV-associated lymphomas of T and NK cell lineage (TNKL) and classified the cases according to their disease presentation (nodal vs extranodal), nasal involvement and cell of origin (COO). In order to maintain an unbiased approach from the onset, we performed unsupervised clustering of the GEP and copy number changes of all 66 cases and this revealed 3 distinct clusters which were associated with specific copy number changes. This supported the notion that nodal TNKL is distinct from those with extranodal disease. We therefore proceeded to study the clinical, pathologic and molecular signature and copy number profile of nodal cases and compared them to the extranodal group. In addition, we also compared the GEP and CNA of the nodal-group with normal lymph node controls to further understand the molecular biology of this group of tumors since there is currently little known about them.

**Figure S3**

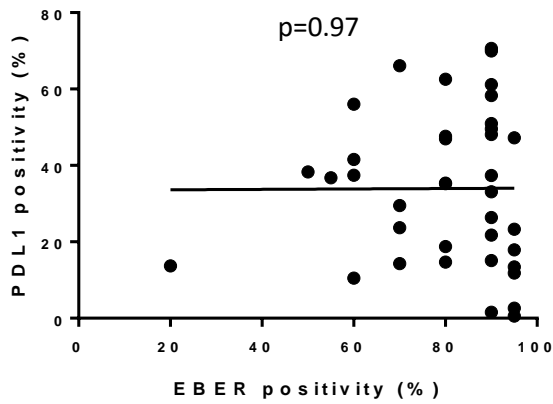

**Figure S3.** There was no significant correlation of PDL1 expression with EBER expression in tumor cell population.

**Figure S4**

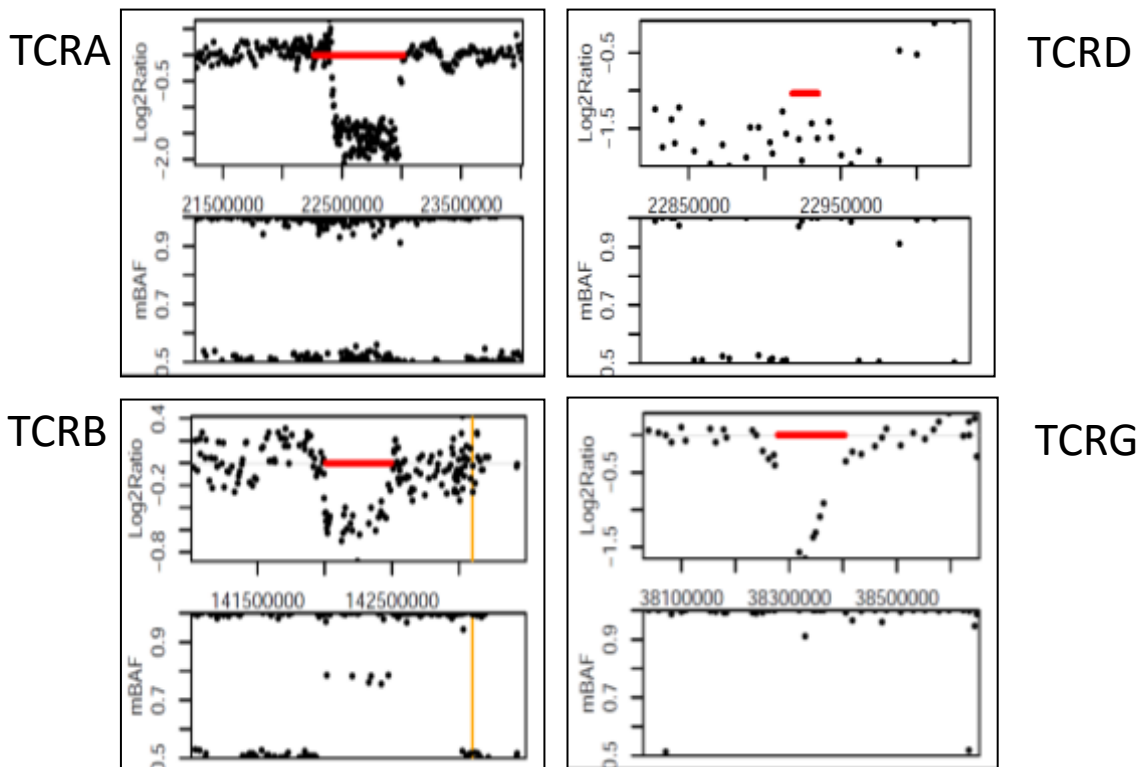

**Figure S4.** Deletion of TCR loci in TNKL of T-cell origin. Log2 Ratio and Mirrored B Allele Frequency (mBAF) plots of a case of TNKL of T-cell origin (TNK4) demonstrating loss of TCRA, TCRB and TCRD loci. The horizontal red lines indicate the positions of the TCR loci and the orange vertical line demarcates cytoband

boundary. Though TCRG locus shown here seems to indicate deletion, the OncoScan Console did not mark it as deleted possibly due to short span.

**Figure S5**

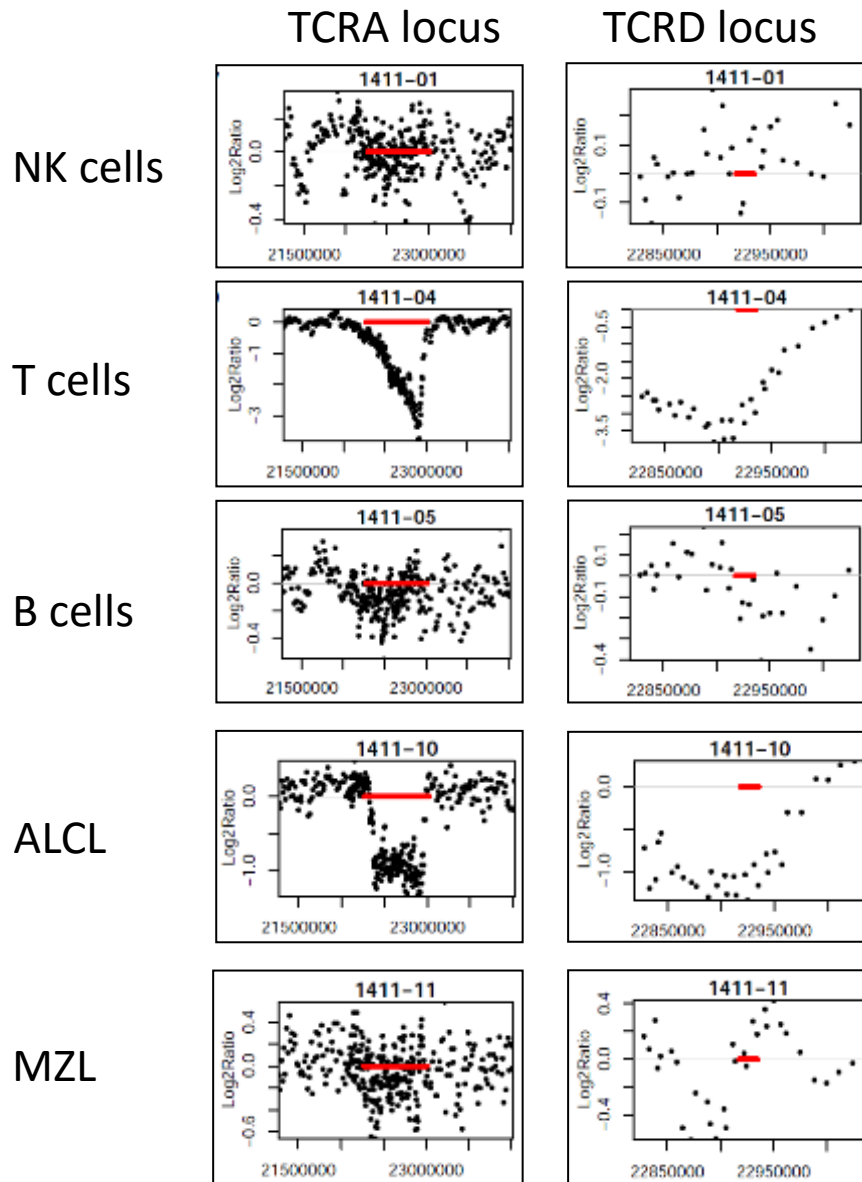

**Figure S5.** TCRA and TCRD loci in normal NK cells, B cells, T cells, Anaplastic large cell lymphoma (ALCL) and marginal zone lymphoma (MZL) samples. Log2 Ratio plots illustrate loss of TCRA and TCRD loci in normal T cells, and ALCL, but not in normal NK cells, B cells, and MZL.

**Figure S6**

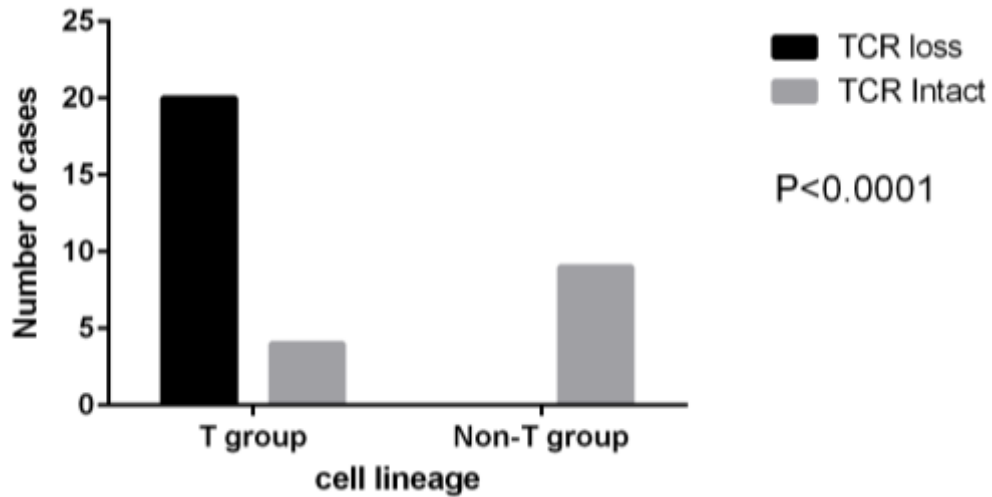

**Figure S6.** Association between status of TCR loci and cell of origin. T-group samples includes TNKL of T-origin (n=16), PTCL (N=6) and normal T-cells (n=2). Non-T group samples include TNKL of NK origin (n=5), normal B cells (n=2) and normal NK cells (n=2)

**Figure S7**

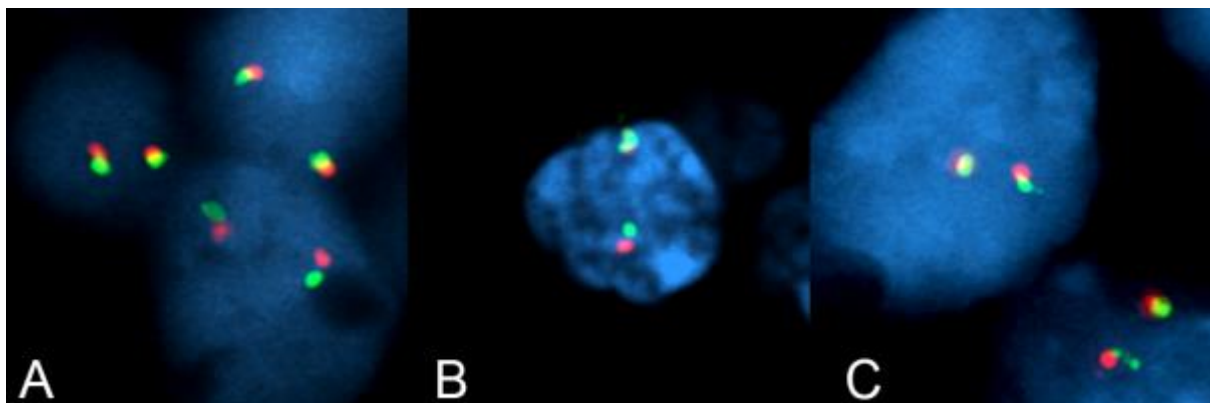

**Figure S7.** Fluorescence in situ hybridization for *TCRA* locus using breakapart probe. The probe specific for the 5' (centromeric) and 3' (telomeric) regions of the *TCRA* locus were labeled in P5 Green and Red, respectively. Our results showed

an intact *TCRA* locus in normal T cells (A), normal NK cells (B), and T-cell lymphoma (C), indicating an absence of translocation of the *TCRA* locus.

**Figure S8**

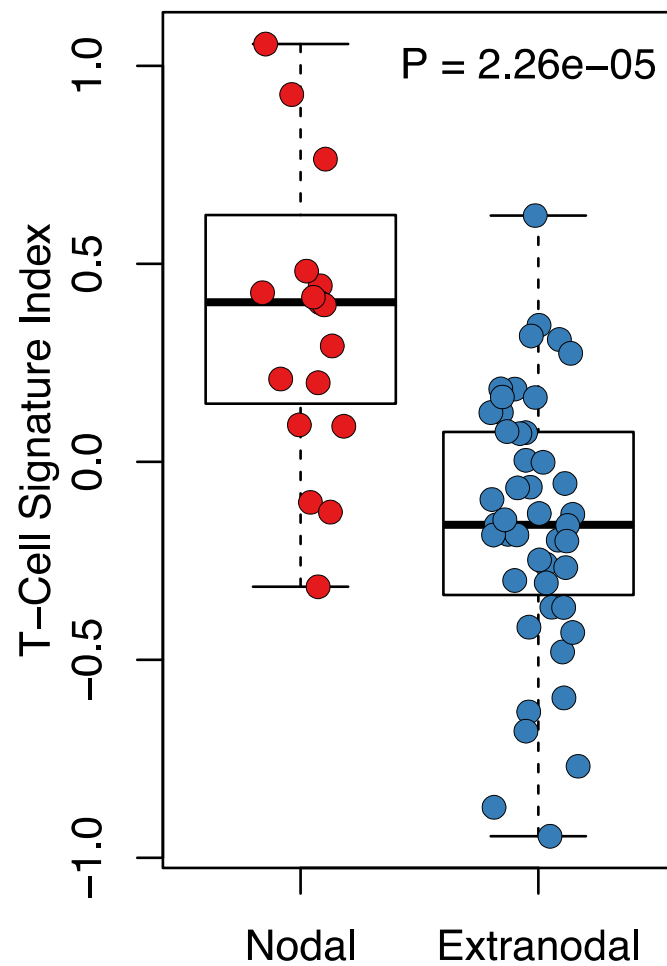

**Figure S8.** Comparison of T-cell signature between Nodal-group and Extranodal-group. Results showed a significantly higher expression of the T-cell related genes in Nodal-group compared to Extranodal-group.
